# Supplementary material for: Design and organocatalytic synthesis of spirooxindole–cyclopentene–isoxazole hybrids as novel MDM2–p53 inhibitors
Source: Royal Society of Chemistry journal article supplement (doi:10.1039/d0qo01626h), 2021-01-01
Supplement: d0qo01626h1.pdf [file d0qo01626h1.pdf]

# Design and organocatalytic synthesis of spirooxindole-cyclopentene-isoxazole hybrids as novel MDM2-p53 inhibitors

Xin Xie,<sup>a</sup> Shan-Shan Xiong,<sup>b</sup> Xiang Li, He Huang, Wei Huang, Feng-Bo Wu,<sup>b</sup> Peng-Fei Shen,<sup>b</sup> Cheng Peng,<sup>\*a</sup> Gu He<sup>\*b</sup> and Bo Han<sup>\*a</sup>

<sup>a</sup>College of Medical Technology and School of Pharmacy, State Key Laboratory of Southwestern Chinese Medicine Resources, Chengdu University of Traditional Chinese Medicine, Chengdu 611137, China. E-mail: pengcheng@cducm.edu.cn or hanbo@cducm.edu.cn

<sup>b</sup>State Key Laboratory of Biotherapy and Department of Pharmacy, West China Hospital, Sichuan University, Chengdu, 610041, China. E-mail: hegu@scu.edu.cn

## Supporting information

### Table of Contents

|                                                                 |     |
|-----------------------------------------------------------------|-----|
| 1. General methods .....                                        | S2  |
| 2. Reaction conditions screening for the [3+2] annulation ..... | S3  |
| 3. Chiral catalysts screening for the [3+2] annulation .....    | S5  |
| 4. General procedures for the synthesis of products 4 .....     | S7  |
| 5. Gram-scale synthesis of products 4a .....                    | S20 |
| 6. Crystal data of 4g .....                                     | S21 |
| 7. NMR spectra .....                                            | S23 |
| 8. Experimental procedures of bioassays .....                   | S52 |
| 9. Predicted ADMET properties of 4z .....                       | S55 |
| 10. References .....                                            | S57 |

## 1. General methods

- Proton nuclear magnetic resonance ( $^1\text{H}$  NMR) spectra were recorded with Bruker AV 400 MHz or 600 MHz spectrometers. Proton chemical shifts are reported in parts per million ( $\delta$  scale), and are referenced using residual protium in the NMR solvent ( $\text{CDCl}_3$ :  $\delta$  7.26 ( $\text{CHCl}_3$ )). Data are reported as follows: chemical shift [multiplicity (s = singlet, d = doublet, t = triplet, q = quartet, m = multiplet, br s = broad singlet), coupling constant(s) (Hz), integration].

- Carbon-13 nuclear magnetic resonance ( $^{13}\text{C}$  NMR) spectra were recorded with Bruker AV 100 MHz or 150 MHz spectrometers. Carbon chemical shifts are reported in parts per million ( $\delta$  scale), and are referenced using the carbon resonances of the solvent ( $\text{CDCl}_3$ :  $\delta$  77.0 ( $\text{CHCl}_3$ )). Data are reported as follows: chemical shift [multiplicity (if not singlet), assignment ( $\text{C}_q$  = fully substituted carbon)].

- High resolution mass spectra (HRMS) were recorded on a Waters SYNAPT G2 using an electrospray (ESI) ionization source.

- Column chromatography was performed on silica gel (400-500 mesh) eluting with ethyl acetate and petroleum ether. TLC was performed on glass-backed silica plates. UV light and I2 were used to visualize products.

- Melting points were determined on a Mel-Temp apparatus and are uncorrected.

- The MBH carbonates<sup>1</sup> and 4-nitro-5-alkenylisoxazoles<sup>2</sup> were prepared according to the literature procedures.

## 2. Reaction conditions screening for the [3+2] annulation

**Table S1** Reaction conditions screening for the [3+2] annulation. <sup>a</sup>

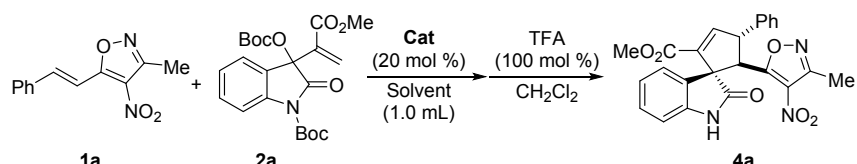

| Entry           | Cat              | Solvent    | <i>T</i> (°C) | t (h)    | Yield <sup>b</sup> (%) | d.r. <sup>c</sup> (%) |
|-----------------|------------------|------------|---------------|----------|------------------------|-----------------------|
| 1               | DABCO            | Tol        | RT            | 12       | -                      | -                     |
| 2               | PPh <sub>3</sub> | Tol        | RT            | 12       | -                      | -                     |
| 3               | DMAP             | Tol        | RT            | 6        | 82                     | 11:1                  |
| 4               | DMAP             | DCM        | RT            | 6        | 91                     | 15:1                  |
| 5               | DMAP             | DCE        | RT            | 6        | 88                     | 14:1                  |
| 6               | DMAP             | EtOAc      | RT            | 6        | 77                     | 10:1                  |
| 7               | DMAP             | MeCN       | RT            | 6        | 70                     | 8:1                   |
| 8               | DMAP             | DCM        | 0             | 6        | 91                     | 15:1                  |
| <b>9</b>        | <b>DMAP</b>      | <b>DCM</b> | <b>-10</b>    | <b>8</b> | <b>90</b>              | <b>&gt;19:1</b>       |
| 10              | DMAP             | DCM        | -20           | 10       | 84                     | >19:1                 |
| 11 <sup>d</sup> | DMAP             | DCM        | -10           | 8        | 88                     | >19:1                 |
| 12 <sup>e</sup> | DMAP             | DCM        | -10           | 8        | 90                     | 18:1                  |

<sup>a</sup> MBH carbonate **1a** (0.1 mmol) with 4-nitro-5-alkenylisoxazole **2a** (0.11 mmol, 1.1 equiv) were employed as model substrates.

<sup>b</sup> Yield was calculated from the isolated pure diastereomer.

<sup>c</sup> d.r. value was determined by <sup>1</sup>H NMR analysis of the crude reaction mixture.

<sup>d</sup> MBH carbonate **1a** (0.1 mmol) with 4-nitro-5-alkenylisoxazole **2a** (0.2 mmol, 2.0 equiv) were employed.

<sup>e</sup> MBH carbonate **1a** (0.1 mmol) with 4-nitro-5-alkenylisoxazole **2a** (0.05 mmol, 1.0 equiv) were employed.

To test the feasibility of our proposal, the initial reaction of 4-nitro-5-styrylisoxazole **1a** and MBH carbonate **2a** was carried out in the presence of common used Lewis bases (DBACO, PPh<sub>3</sub>, and DMAP) in toluene (1.0 mL) at ambient temperature. To our delight, the expected deprotected [3+2] annulation product **4a** was cleanly obtained in remarkable yield and diastereoselectivity when using DMAP as catalyst after 6 hours (Table 1, entry 3). The reaction exhibited exclusive  $\alpha$ -regioselectivity, and no desired product was observed with the catalysis of PPh<sub>3</sub> and DBACO (entries 1-2). This result encouraged us to explore other conditions to get more desirable results in terms of reaction efficiency and diastereoselectivity (entries 4-7). Impressively, using dichloromethane as solvent afforded **4a** in 88% yield with diastereoselectivity of up to 15:1 (entry 4). Next, we investigated the influence of other

reaction parameters, including temperature and ratio of reagents. Lowering reaction temperature in overall led to excellent d.r. value regardless of longer reaction time (entries 8-10). Notably, the optimal temperature of -10 °C furnished target desirable product with impressive >20:1 diastereoselectivity, albeit with a negligible loss in yield (entry 9). Moreover, changing the ratio of reagents led to inferior results either in yield or diastereoselective performance (entries 11-12).

### 3. Chiral catalysts screening for the [3+2] annulation

Table S2 Attempt to asymmetric catalytic synthesis of chiral product. <sup>a</sup>

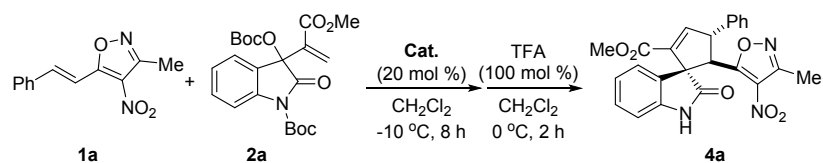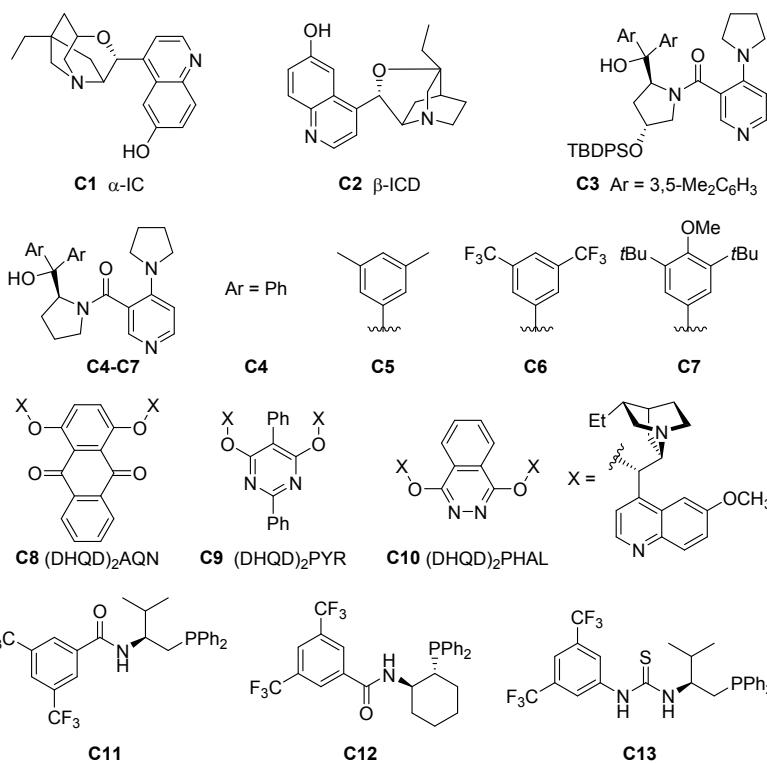

| Entry | Cat        | Yield <sup>b</sup> (%) | d.r. <sup>c</sup><br>(%) | e.e. <sup>d</sup><br>(%) |
|-------|------------|------------------------|--------------------------|--------------------------|
| 1     | DMAP       | 90                     | >19:1                    | -                        |
| 2     | <b>C1</b>  | 37                     | 8:1                      | <10                      |
| 3     | <b>C2</b>  | 30                     | 8:1                      | <-10                     |
| 4     | <b>C3</b>  | 72                     | 15:1                     | 12                       |
| 5     | <b>C4</b>  | 64                     | 17:1                     | 10                       |
| 6     | <b>C5</b>  | 58                     | 17:1                     | 16                       |
| 7     | <b>C6</b>  | 50                     | 16:1                     | 14                       |
| 8     | <b>C7</b>  | 48                     | 17:1                     | 16                       |
| 9     | <b>C8</b>  | 32                     | 12:1                     | <10                      |
| 10    | <b>C9</b>  | 41                     | 7:1                      | <10                      |
| 11    | <b>C10</b> | 34                     | 9:1                      | 11                       |
| 12    | <b>C11</b> | <10                    | -                        | -                        |
| 13    | <b>C12</b> | <10                    | -                        | -                        |
| 14    | <b>C13</b> | <10                    | -                        | -                        |

<sup>a</sup> A mixture of **1** (0.1 mmol), **2** (0.11 mmol, 1.1 equiv) and catalyst (20 mol%) in DCM (1.0 mL) was stirred at -10 °C for about 8 h. After the consumption of **1**, the mixture was stirred at -10 °C followed by addition of TFA (100 mol% in 0.5 mL DCM) and then moved to room temperature for 2 h.

<sup>b</sup> Yield was calculated from the isolated pure diastereomer.

<sup>c</sup> d.r. value was determined by <sup>1</sup>H NMR analysis of the crude reaction mixture.

<sup>d</sup> e.e. values were calculated from chiral HPLC analysis of major isomer **4a**.

With the optimal conditions in hand, then we attempted to develop an asymmetric catalytic version of this [3+2] annulation using a series of classic catalysts such as chiral phosphines catalysts and chiral amine catalysts. We screened a variety of chiral quinine catalysts, tertiary phosphines catalyst, chiral DMAP-type catalysts for their ability to generate the chiral product **4a**.  $\alpha$ -Isocupreine **C1** ( $\alpha$ -IC) and  $\beta$ -isocupreidine **C2** ( $\beta$ -ICD) were found to be efficient in the reaction, affording the desired [3+2] product **4a** in poor yield, with accepted diastereoselectivity but no enantiomeric purity (entry 2-3). Inspired by the high efficiency of DMAP, a series of chiral DMAP-type catalysts were utilized and found moderate efficiency, giving product **4a** with high diastereoselectivity but poor enantiomeric purity (entry 4-8). Chiral quinine catalyst provided low reaction efficiency, accepted diastereoselectivity but poor enantiomeric purity. Similar as PPh<sub>3</sub>, chiral tertiary phosphines catalyst failed to catalyze this reaction smoothly (entry 12-14).

#### 4. General procedures for the synthesis of products 4

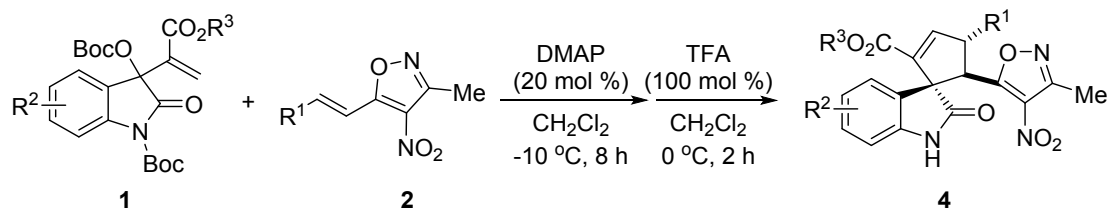

A mixture of MBH carbonate **1** (0.1 mmol) with 4-nitro-5-alkenylisoxazole **2** (0.11 mmol, 1.1 equiv) was added dimethylaminopyridine (DMAP, 20 mol%) in dichloromethane (1.0 mL) at -10 °C. The reaction mixture was stirred at -10 °C for about 8 hours. After the consumption of MBH carbonate **1**, the mixture was stirred at -10 °C followed by addition of trifluoroacetic acid (TFA, 100 mol% in 0.5 mL DCM) and then moved to room temperature for about 2 hours. The mixture was stirred until the reaction had stopped progressing as observed by TLC analysis, then diluted with EtOAc and washed with saturated aqueous NaHCO<sub>3</sub>, and brine. Then the solution was concentrated and the residue was purified by flash chromatography on silica gel (petroleum ether/ethyl acetate = 5:1 to 3:1) to afford product **4**, which was dried under vacuum and further analyzed by <sup>1</sup>H NMR, <sup>13</sup>C NMR and high-resolution mass spectrometry.

#### **Methyl-5-(3-methyl-4-nitroisoxazol-5-yl)-2'-oxo-4-phenylspiro[cyclopentane-1,3'-indolin]-2-ene-2-carboxylate 4a:**

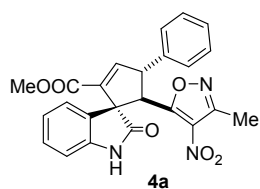

white solid, 40.1 mg, 90% yield, dr >19:1, m.p. >210 °C; <sup>1</sup>H NMR (600 MHz, CDCl<sub>3</sub>) δ (ppm) 8.32 (s, 1H), 7.40 (d, *J* = 7.2 Hz, 2H), 7.36 (t, *J* = 7.8 Hz, 2H), 7.30 (t, *J* = 7.2 Hz, 1H), 7.19 (d, *J* = 1.8 Hz, 1H), 7.15 – 7.11 (m, 1H), 7.05 (d, *J* = 7.8 Hz, 1H), 6.88 (t, *J* = 7.8 Hz, 1H), 6.81 (d, *J* = 7.8 Hz, 1H), 5.24 (dd, *J* = 8.4, 1.8 Hz, 1H), 4.99 (d, *J* = 8.4 Hz, 1H), 3.63 (s, 3H), 2.31 (s, 3H); <sup>13</sup>C NMR (150 MHz, CDCl<sub>3</sub>) δ (ppm) 178.6, 170.2, 162.5, 155.9, 148.1, 141.3, 139.8, 136.4, 130.8, 129.5, 129.3, 128.2, 128.0, 127.2, 124.4, 122.3, 110.2, 64.3, 55.4, 52.9, 52.2, 11.5; HRMS (ESI-TOF) *m/z*: [M + Na]<sup>+</sup> Calcd for C<sub>24</sub>H<sub>19</sub>N<sub>3</sub>O<sub>6</sub>Na 468.1172, found 468.1170.

**Methyl-4-(4-fluorophenyl)-5-(3-methyl-4-nitroisoxazol-5-yl)-2'-oxospiro[cyclopentane-1,3'-indolin]-2-ene-2-carboxylate 4b:**

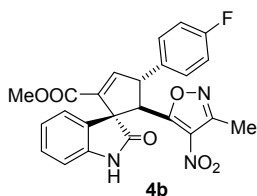

white solid, 38.3 mg, 86% yield, dr >19:1, m.p. >210 °C; <sup>1</sup>H NMR (600 MHz, CDCl<sub>3</sub>) δ (ppm) 8.20 (s, 1H), 7.40 – 7.38 (m, 2H), 7.16 (d, *J* = 1.8 Hz, 1H), 7.13 (dd, *J* = 7.8, 1.2 Hz, 1H), 7.05 (t, *J* = 8.4 Hz, 2H), 7.02 (d, *J* = 7.2 Hz, 1H), 6.88 (t, *J* = 7.8 Hz, 1H), 6.81 (d, *J* = 7.8 Hz, 1H), 5.24 (dd, *J* = 8.4, 2.4 Hz, 1H), 4.93 (d, *J* = 9.0 Hz, 1H), 3.64 (s, 3H), 2.32 (s, 3H); <sup>13</sup>C NMR (150 MHz, CDCl<sub>3</sub>) δ (ppm) 178.6, 170.1, 162.6 (d, *J*<sub>CF</sub> = 246.0 Hz), 162.4, 156.0, 147.7, 141.2, 136.5, 135.6 (d, *J*<sub>CF</sub> = 2.4 Hz), 130.8, 129.7, 129.6 (d, *J*<sub>CF</sub> = 8.7 Hz), 127.1, 124.3, 122.4, 116.3 (d, *J*<sub>CF</sub> = 21.0 Hz), 110.2, 64.2, 55.5, 52.2, 52.2, 11.5; HRMS (ESI-TOF) *m/z*: [M + Na]<sup>+</sup> Calcd for C<sub>24</sub>H<sub>18</sub>FN<sub>3</sub>O<sub>6</sub>Na 486.1077, found 486.1079.

**methyl-4-(4-chlorophenyl)-5-(3-methyl-4-nitroisoxazol-5-yl)-2'-oxospiro[cyclopentane-1,3'-indolin]-2-ene-2-carboxylate 4c:**

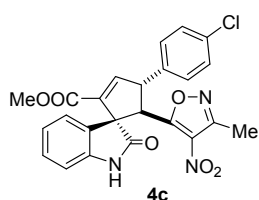

white solid, 41.4 mg, 93% yield, dr >19:1, m.p. >210 °C; <sup>1</sup>H NMR (600 MHz, CDCl<sub>3</sub>) δ (ppm) 8.12 (s, 1H), 7.35 – 7.32 (m, 4H), 7.15 – 7.13 (m, 2H), 7.01 (d, *J* = 7.2 Hz, 1H), 6.88 (t, *J* = 7.8 Hz, 1H), 6.80 (d, *J* = 7.8 Hz, 1H), 5.22 (dd, *J* = 8.4, 2.4 Hz, 1H), 4.92 (d, *J* = 8.4 Hz, 1H), 3.63 (s, 3H), 2.32 (s, 3H); <sup>13</sup>C NMR (150 MHz, CDCl<sub>3</sub>) δ (ppm) 178.4, 169.9, 162.4, 156.0, 147.3, 141.2, 138.3, 136.7, 134.2, 130.8, 129.6, 129.5, 129.4, 127.0, 124.3, 122.4, 110.2, 64.2, 55.3, 52.3, 52.2, 11.5; HRMS (ESI-TOF) *m/z*: [M + Na]<sup>+</sup> Calcd for C<sub>24</sub>H<sub>18</sub>ClN<sub>3</sub>O<sub>6</sub>Na 502.0782, found 502.0781.

**Methyl-4-(3,4-dichlorophenyl)-5-(3-methyl-4-nitroisoxazol-5-yl)-2'-oxospiro[cyclopentane-1,3'-indolin]-2-ene-2-carboxylate 4d:**

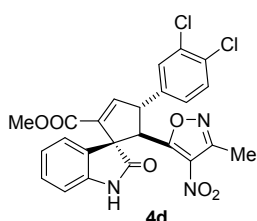

white solid, 34.3 mg, 77% yield, dr 15:1, m.p. >210 °C; <sup>1</sup>H NMR (600 MHz, CDCl<sub>3</sub>) δ (ppm) <sup>1</sup>H NMR (600 MHz, ) δ 8.24 (s, 1H), 7.50 (d, *J* = 1.8 Hz, 1H), 7.45 (d, *J* = 8.4 Hz, 1H), 7.29 (dd, *J* = 8.4, 1.8 Hz, 1H), 7.14 (t, *J* = 7.8 Hz, 1H), 7.12 (d, *J* = 2.4 Hz,



1H), 6.98 (d,  $J = 7.2$  Hz, 1H), 6.87 (t,  $J = 7.8$  Hz, 1H), 6.82 (d,  $J = 7.8$  Hz, 1H), 5.19 (dd,  $J = 8.4, 2.4$  Hz, 1H), 4.91 (d,  $J = 8.4$  Hz, 1H), 3.64 (s, 3H), 2.33 (s, 3H);  $^{13}\text{C}$  NMR (150 MHz,  $\text{CDCl}_3$ )  $\delta$  (ppm)  $^{13}\text{C}$  NMR (150 MHz, )  $\delta$  178.4, 169.7, 162.3, 156.1, 146.5, 141.3, 140.0, 137.2, 133.4, 132.6, 131.4, 130.8, 130.0, 129.7, 127.4, 126.8, 124.2, 122.4, 110.3, 64.3, 55.1, 52.3, 52.0, 11.5; HRMS (ESI-TOF)  $m/z$ :  $[\text{M} + \text{Na}]^+$  Calcd for  $\text{C}_{24}\text{H}_{17}\text{Cl}_2\text{N}_3\text{O}_6\text{Na}$  536.0392, found 536.0389.

**Methyl-4-(2-bromophenyl)-5-(3-methyl-4-nitroisoxazol-5-yl)-2'-oxospiro[cyclopentane-1,3'-indolin]-2-ene-2-carboxylate 4e:**

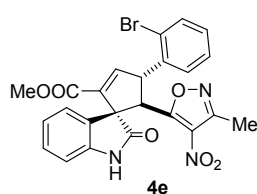

white solid, 40.5 mg, 91% yield, dr >19:1, m.p. >210 °C;  $^1\text{H}$  NMR (600 MHz,  $\text{CDCl}_3$ )  $\delta$  (ppm) 8.08 (s, 1H), 7.71 (dd,  $J = 7.8, 1.8$  Hz, 1H), 7.53 (d,  $J = 7.8, 0.6$  Hz, 1H), 7.41 (t,  $J = 7.2$  Hz, 1H), 7.17 (td,  $J = 7.8, 1.2$  Hz, 1H), 7.14 – 7.13 (m, 2H), 6.98 (d,  $J = 7.2$  Hz, 1H), 6.87 (t,  $J = 7.8$  Hz, 1H), 6.79 (d,  $J = 7.8$  Hz, 1H), 5.73 (dd,  $J = 7.2, 2.4$  Hz, 1H), 4.99 (d,  $J = 7.2$  Hz, 1H), 3.62 (s, 3H), 2.33 (s, 3H);  $^{13}\text{C}$  NMR (150 MHz,  $\text{CDCl}_3$ )  $\delta$  (ppm) 178.6, 170.5, 162.5, 155.7, 147.7, 141.3, 139.7, 136.5, 133.1, 130.5, 130.1, 129.7, 129.6, 128.7, 127.2, 124.5, 124.0, 122.4, 110.9, 64.5, 53.8, 52.2, 52.1, 11.5; HRMS (ESI-TOF)  $m/z$ :  $[\text{M} + \text{Na}]^+$  Calcd for  $\text{C}_{24}\text{H}_{18}\text{BrN}_3\text{O}_6\text{Na}$  546.0277, found 546.0276.

**Methyl-4-(3-bromophenyl)-5-(3-methyl-4-nitroisoxazol-5-yl)-2'-oxospiro[cyclopentane-1,3'-indolin]-2-ene-2-carboxylate 4f:**

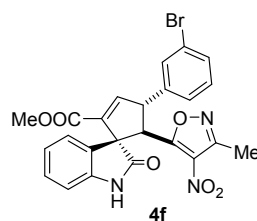

white solid, 37.9 mg, 85% yield, dr 15:1, m.p. >210 °C;  $^1\text{H}$  NMR (600 MHz,  $\text{CDCl}_3$ )  $\delta$  (ppm) 8.19 (s, 1H), 7.53 (t,  $J = 1.8$  Hz, 1H), 7.45 (d,  $J = 7.8$  Hz, 1H), 7.37 (d,  $J = 7.8$  Hz, 1H), 7.25 (t,  $J = 7.8$  Hz, 1H), 7.15 – 7.14 (m, 2H), 7.00 (d,  $J = 7.8$  Hz, 1H), 6.87 (t,  $J = 7.2$  Hz, 1H), 6.81 (d,  $J = 7.8$  Hz, 1H), 5.20 (dd,  $J = 9.0, 2.4$  Hz, 1H), 4.94 (d,  $J = 8.4$  Hz, 1H), 3.64 (s, 3H), 2.33 (s, 3H);  $^{13}\text{C}$  NMR (150 MHz,  $\text{CDCl}_3$ )  $\delta$  (ppm) 178.4, 169.9, 162.4, 156.0, 147.1, 142.2, 141.2, 136.9, 131.5, 131.1, 131.0, 130.7, 129.7, 127.0, 126.7, 124.3, 123.3, 122.4, 110.2, 64.3, 55.2, 52.4, 52.3, 11.5; HRMS (ESI-TOF)  $m/z$ :  $[\text{M} + \text{Na}]^+$  Calcd for  $\text{C}_{24}\text{H}_{18}\text{BrN}_3\text{O}_6\text{Na}$  546.0277, found 546.0279.

**Methyl-4-(4-bromophenyl)-5-(3-methyl-4-nitroisoxazol-5-yl)-2'-oxospiro[cyclopentane-1,3'-indolin]-2-ene-2-carboxylate 4g:**

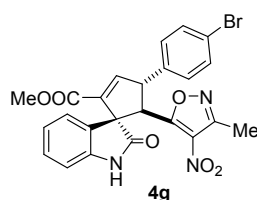

white solid, 41.0 mg, 92% yield, dr >19:1, m.p. >210 °C; <sup>1</sup>H NMR (600 MHz, CDCl<sub>3</sub>) δ (ppm) 7.98 (s, 1H), 7.49 (d, *J* = 7.8 Hz, 2H), 7.29 (d, *J* = 8.4 Hz, 2H), 7.15 – 7.13 (m, 2H), 7.00 (d, *J* = 7.2 Hz, 1H), 6.88 (t, *J* = 7.2 Hz, 1H), 6.79 (d, *J* = 7.8 Hz, 1H), 5.21 (dd, *J* = 8.4, 1.8 Hz, 1H), 4.91 (d, *J* = 8.4 Hz, 1H), 3.63 (s, 3H), 2.32 (s, 3H); <sup>13</sup>C NMR (150 MHz, CDCl<sub>3</sub>) δ (ppm) 178.4, 169.9, 162.4, 156.0, 147.2, 141.1, 138.8, 136.7, 132.5, 130.7, 129.7, 129.7, 127.0, 124.3, 122.4, 122.3, 110.2, 64.2, 55.3, 52.3, 52.2, 11.5; HRMS (ESI-TOF) *m/z*: [M + Na]<sup>+</sup> Calcd for C<sub>24</sub>H<sub>18</sub>BrN<sub>3</sub>O<sub>6</sub>Na 546.0277, found 546.0280.

**Methyl-5-(3-methyl-4-nitroisoxazol-5-yl)-4-(4-nitrophenyl)-2'-oxospiro[cyclopentane-1,3'-indolin]-2-ene-2-carboxylate 4h:**

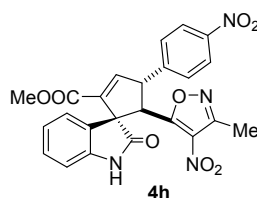

white solid, 37.2 mg, 84% yield, dr 10:1, m.p. >210 °C; <sup>1</sup>H NMR (600 MHz, CDCl<sub>3</sub>) δ (ppm) 8.23 (d, *J* = 9.0 Hz, 2H), 8.13 (s, 1H), 7.62 (d, *J* = 9.0 Hz, 2H), 7.17 – 7.14 (m, 2H), 6.99 (d, *J* = 7.2 Hz, 1H), 6.89 (t, *J* = 7.2 Hz, 1H), 6.82 (d, *J* = 7.8 Hz, 1H), 5.36 (dd, *J* = 8.4, 1.8 Hz, 1H), 4.95 (d, *J* = 8.4 Hz, 1H), 3.65 (s, 3H), 2.33 (s, 3H); <sup>13</sup>C NMR (150 MHz, CDCl<sub>3</sub>) δ (ppm) 178.1, 169.4, 162.1, 156.0, 147.8, 147.1, 145.9, 141.1, 137.5, 130.6, 129.7, 129.0, 126.6, 124.5, 124.2, 122.4, 110.2, 64.3, 54.9, 52.3, 52.2, 11.4; HRMS (ESI-TOF) *m/z*: [M + Na]<sup>+</sup> Calcd for C<sub>24</sub>H<sub>18</sub>N<sub>4</sub>O<sub>8</sub>Na 531.1022, found 531.1020.

**Methyl-5-(3-methyl-4-nitroisoxazol-5-yl)-4-(naphthalen-2-yl)-2'-oxospiro[cyclopentane-1,3'-indolin]-2-ene-2-carboxylate 4i:**

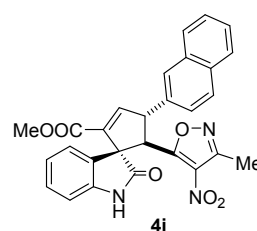

white solid, 41.4 mg, 93% yield, dr >19:1, m.p. >210 °C; <sup>1</sup>H NMR (600 MHz, CDCl<sub>3</sub>) δ (ppm) 8.44 (s, 1H), 8.17 (d, *J* = 8.4 Hz, 1H), 7.87 (d, *J* = 7.8 Hz, 1H), 7.82 (d, *J* = 8.4 Hz, 1H), 7.77 (d, *J* = 6.6 Hz, 1H), 7.55 – 7.50 (m, 3H),

7.30 (d,  $J = 2.4$  Hz, 1H), 7.16 – 7.12 (m, 2H), 6.92 (t,  $J = 7.2$  Hz, 1H), 6.81 (d,  $J = 7.8$  Hz, 1H), 6.00 (dd,  $J = 8.4, 1.2$  Hz, 1H), 5.24 (d,  $J = 9.0$  Hz, 1H), 3.64 (s, 3H), 2.25 (s, 3H);  $^{13}\text{C}$  NMR (150 MHz,  $\text{CDCl}_3$ )  $\delta$  (ppm) 178.9, 170.3, 162.6, 155.9, 149.0, 141.4, 136.1, 134.1, 131.3, 130.7, 129.6, 129.3, 128.8, 127.4, 126.9, 126.9, 126.1, 124.5, 122.7, 122.3, 110.3, 64.5, 54.8, 52.2, 11.5; HRMS (ESI-TOF)  $m/z$ :  $[\text{M} + \text{Na}]^+$  Calcd for  $\text{C}_{28}\text{H}_{21}\text{N}_3\text{O}_6\text{Na}$  518.1328, found 518.1330.

**Methyl-5-(3-methyl-4-nitroisoxazol-5-yl)-2'-oxo-4-(o-tolyl)spiro[cyclopentane-1,3'-indolin]-2-ene-2-carboxylate 4j:**

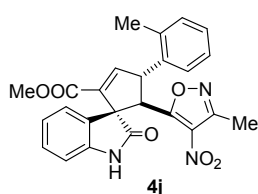

white solid, 39.2 mg, 88% yield, dr >19:1, m.p. >210 °C;  $^1\text{H}$  NMR (600 MHz,  $\text{CDCl}_3$ )  $\delta$  (ppm) 8.06 (s, 1H), 7.60 (d,  $J = 7.8$  Hz, 1H), 7.29 (t,  $J = 7.2$  Hz, 1H), 7.21 – 7.18 (m, 1H), 7.15 – 7.13 (m, 3H), 7.04 (d,  $J = 7.2$  Hz, 1H), 6.88 (t,  $J = 7.6$  Hz, 1H), 6.79 (d,  $J = 7.8$  Hz, 1H), 5.48 (dd,  $J = 8.4, 2.4$  Hz, 1H), 5.07 (d,  $J = 8.4$  Hz, 1H), 3.62 (s, 3H), 2.35 (s, 3H), 2.30 (s, 3H);  $^{13}\text{C}$  NMR (150 MHz,  $\text{CDCl}_3$ )  $\delta$  (ppm) 178.7, 170.5, 162.5, 155.9, 148.9, 141.2, 138.1, 135.8, 135.7, 130.9, 130.6, 129.5, 128.7, 128.0, 127.4, 124.4, 122.3, 110.1, 64.3, 54.8, 52.1, 49.0, 19.9, 11.5; HRMS (ESI-TOF)  $m/z$ :  $[\text{M} + \text{Na}]^+$  Calcd for  $\text{C}_{25}\text{H}_{21}\text{N}_3\text{O}_6\text{Na}$  482.1328, found 482.1325.

**Methyl-4-(2-methoxyphenyl)-5-(3-methyl-4-nitroisoxazol-5-yl)-2'-oxospiro[cyclopentane-1,3'-indolin]-2-ene-2-carboxylate 4k:**

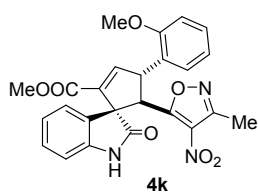

white solid, 38.3 mg, 86% yield, dr >19:1, m.p. >210 °C;  $^1\text{H}$  NMR (600 MHz,  $\text{CDCl}_3$ )  $\delta$  (ppm) 8.38 (s, 1H), 7.43 (dd,  $J = 7.5, 1.4$  Hz, 1H), 7.28 – 7.27 (m, 1H), 7.25 (t,  $J = 1.8$  Hz, 1H), 7.11 (td,  $J = 7.8, 1.2$  Hz, 1H), 7.07 (d,  $J = 7.8$  Hz, 1H), 7.0 – 6.9 (m, 1H), 6.87 (t,  $J = 7.2$  Hz, 1H), 6.83 (d,  $J = 8.4$  Hz, 1H), 6.78 (d,  $J = 7.8$  Hz, 1H), 5.57 (dd,  $J = 8.4, 2.4$  Hz, 1H), 5.03 (d,  $J = 8.4$  Hz, 1H), 3.69 (s, 3H), 3.61 (s, 3H), 2.32 (s, 3H);  $^{13}\text{C}$  NMR (150 MHz,  $\text{CDCl}_3$ )  $\delta$  (ppm) 178.8, 171.7, 162.7, 156.9, 155.4, 148.9, 141.3, 135.6, 130.3, 129.4, 129.2, 128.7, 128.1, 127.6, 124.7, 122.1, 121.3, 110.7, 110.0, 64.3, 55.4, 53.2, 52.1, 47.1, 11.5; HRMS (ESI-TOF)  $m/z$ :  $[\text{M} + \text{Na}]^+$  Calcd for  $\text{C}_{25}\text{H}_{21}\text{N}_3\text{O}_7\text{Na}$  498.1277, found 498.1279.

**Methyl-4-(3,4-dimethoxyphenyl)-5-(3-methyl-4-nitroisoxazol-5-yl)-2'-oxospiro[cyclopentane-1,3'-indolin]-2-ene-2-carboxylate 4l:**

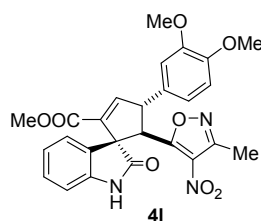

white solid, 35.6 mg, 80% yield, dr 13:1, m.p. 190–191 °C; <sup>1</sup>H NMR (600 MHz, CDCl<sub>3</sub>) δ (ppm) 8.15 (s, 1H), 7.16 (d, *J* = 2.4 Hz, 1H), 7.13 (dt, *J* = 7.8, 0.6 Hz, 1H), 7.01 – 6.99 (m, 2H), 6.92 (dd, *J* = 8.4, 1.8 Hz, 1H), 6.87 (t, *J* = 7.8 Hz, 1H), 6.82 (d, *J* = 8.4 Hz, 1H), 6.79 (d, *J* = 7.8 Hz, 1H), 5.18 (dd, *J* = 8.4, 2.4 Hz, 1H), 4.98 (d, *J* = 8.4 Hz, 1H), 3.92 (s, 3H), 3.86 (s, 3H), 3.63 (s, 3H), 2.32 (s, 3H); <sup>13</sup>C NMR (150 MHz, CDCl<sub>3</sub>) δ (ppm) 178.6, 170.4, 162.5, 155.8, 149.6, 148.8, 148.3, 141.1, 135.8, 132.2, 130.6, 129.4, 127.2, 124.2, 122.2, 120.2, 111.4, 110.7, 110.0, 64.1, 56.1, 55.9, 55.3, 52.7, 52.1, 11.4; HRMS (ESI-TOF) *m/z*: [M + Na]<sup>+</sup> Calcd for C<sub>26</sub>H<sub>23</sub>N<sub>3</sub>O<sub>8</sub>Na 528.1383, found 528.1381.

**Methyl-4-(4-isopropylphenyl)-5-(3-methyl-4-nitroisoxazol-5-yl)-2'-oxospiro[cyclopentane-1,3'-indolin]-2-ene-2-carboxylate 4m:**

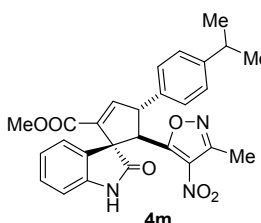

white solid, 37.9 mg, 85% yield, dr >19:1, m.p. 188–189 °C; <sup>1</sup>H NMR (600 MHz, CDCl<sub>3</sub>) δ (ppm) 8.36 (s, 1H), 7.31 (d, *J* = 7.8 Hz, 2H), 7.21 (d, *J* = 8.4 Hz, 2H), 7.18 (d, *J* = 2.4 Hz, 1H), 7.14 – 7.11 (m, 1H), 7.05 (d, *J* = 7.2 Hz, 1H), 6.88 (t, *J* = 7.8 Hz, 1H), 6.81 (d, *J* = 7.8 Hz, 1H), 5.22 (dd, *J* = 8.4, 1.8 Hz, 1H), 4.97 (d, *J* = 8.4 Hz, 1H), 3.62 (s, 3H), 2.89 (dt, *J* = 13.8, 7.2 Hz, 1H), 2.31 (s, 3H), 1.24 (d, *J* = 1.2 Hz, 3H), 1.22 (d, *J* = 1.2 Hz, 3H); <sup>13</sup>C NMR (150 MHz, CDCl<sub>3</sub>) δ (ppm) 178.9, 170.3, 162.6, 155.9, 149.0, 148.4, 141.2, 137.1, 136.1, 130.8, 129.5, 127.9, 127.4, 127.3, 124.4, 122.3, 110.2, 64.3, 55.4, 52.6, 52.2, 33.9, 24.1, 24.0, 11.5; HRMS (ESI-TOF) *m/z*: [M + Na]<sup>+</sup> Calcd for C<sub>27</sub>H<sub>25</sub>N<sub>3</sub>O<sub>6</sub>Na 510.1641, found 510.1644.

**Methyl-4-(furan-2-yl)-5-(3-methyl-4-nitroisoxazol-5-yl)-2'-oxospiro[cyclopentane-1,3'-indolin]-2-ene-2-carboxylate 4n:**

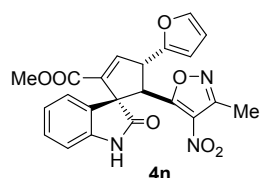

white solid, 37.0 mg, 83% yield, dr >19:1, m.p. 205–206 °C; <sup>1</sup>H NMR (600 MHz, CDCl<sub>3</sub>) δ (ppm) 8.47 (s, 1H), 7.36 (s, 1H), 7.22

(d,  $J = 1.8$  Hz, 1H), 7.13 (t,  $J = 7.8$  Hz, 1H), 7.03 (d,  $J = 7.8$  Hz, 1H), 6.88 (t,  $J = 7.8$  Hz, 1H), 6.82 (d,  $J = 7.8$  Hz, 1H), 6.33 (dd,  $J = 3.0, 1.8$  Hz, 1H), 6.30 (d,  $J = 3.6$  Hz, 1H), 5.33 (dd,  $J = 9.0, 2.4$  Hz, 1H), 5.15 (d,  $J = 9.0$  Hz, 1H), 3.62 (s, 3H), 2.34 (s, 3H);  $^{13}\text{C}$  NMR (150 MHz,  $\text{CDCl}_3$ )  $\delta$  (ppm) 178.2, 169.7, 162.4, 155.8, 151.6, 145.1, 142.9, 141.3, 136.4, 130.8, 129.7, 126.8, 124.5, 122.3, 110.7, 110.3, 107.3, 63.9, 52.2, 51.7, 46.5, 11.5; HRMS (ESI-TOF)  $m/z$ :  $[\text{M} + \text{Na}]^+$  Calcd for  $\text{C}_{22}\text{H}_{17}\text{N}_3\text{O}_7\text{Na}$  458.0964, found 458.0966.

**Methyl-5-(3-methyl-4-nitroisoxazol-5-yl)-2'-oxo-4-(thiophen-2-yl)spiro[cyclopentane-1,3'-indolin]-2-ene-2-carboxylate 4o:**

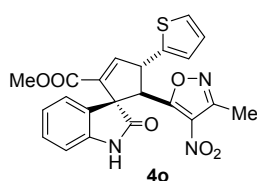

white solid, 35.6 mg, 80% yield, dr >19:1, m.p. >210 °C;  $^1\text{H}$  NMR (600 MHz,  $\text{CDCl}_3$ )  $\delta$  (ppm) 8.61 (s, 1H), 7.24 – 7.23 (m, 2H), 7.13 (t,  $J = 7.8$  Hz, 1H), 7.05 (d,  $J = 6.6$  Hz, 2H), 6.98 (dd,  $J = 4.8, 3.6$  Hz, 1H), 6.88 (t,  $J = 7.2$  Hz, 1H), 6.83 (d,  $J = 7.8$  Hz,

1H), 5.53 (dd,  $J = 9.0, 3.6$  Hz, 1H), 5.05 (d,  $J = 8.4$  Hz, 1H), 3.63 (s, 3H), 2.34 (s, 3H);  $^{13}\text{C}$  NMR (150 MHz,  $\text{CDCl}_3$ )  $\delta$  (ppm) 178.3, 169.6, 162.4, 155.9, 146.9, 141.9, 141.4, 136.2, 131.1, 129.7, 127.6, 126.8, 125.8, 125.5, 124.4, 122.3, 110.4, 64.1, 55.4, 52.3, 47.9, 11.5; HRMS (ESI-TOF)  $m/z$ :  $[\text{M} + \text{Na}]^+$  Calcd for  $\text{C}_{22}\text{H}_{17}\text{N}_3\text{O}_6\text{SNa}$  474.0736, found 474.0733.

**Methyl-5-(3-methyl-4-nitroisoxazol-5-yl)-2'-oxo-4-((E)-styryl)spiro[cyclopentane-1,3'-indolin]-2-ene-2-carboxylate 4p:**

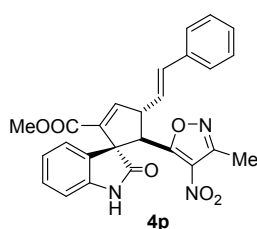

white solid, 32.5 mg, 73% yield, dr >15:1, m.p. 156–157 °C;  $^1\text{H}$  NMR (600 MHz,  $\text{CDCl}_3$ )  $\delta$  (ppm)  $\delta$  7.63 (s, 1H), 7.37 – 7.36 (m, 2H), 7.31 (t,  $J = 7.8$  Hz, 2H), 7.14 – 7.12 (m, 2H), 6.93 (d,  $J = 7.2$  Hz, 1H), 6.86 (td,  $J = 7.8, 0.6$  Hz, 1H), 6.77 (d,  $J = 7.8$  Hz,

1H), 6.60 (d,  $J = 16.2$  Hz, 1H), 6.28 (dd,  $J = 15.6, 8.4$  Hz, 1H), 4.87 (d,  $J = 7.8$  Hz, 1H), 4.83 – 4.79 (m, 1H), 3.62 (s, 3H), 2.34 (s, 3H);  $^{13}\text{C}$  NMR (150 MHz,  $\text{CDCl}_3$ )  $\delta$  (ppm) 178.1, 170.4, 162.5, 155.8, 147.9, 141.0, 135.9, 133.9, 129.6, 128.8, 128.3, 127.2, 126.6, 124.4, 122.4, 109.9, 64.2, 52.5, 52.1, 51.4, 11.5; HRMS (ESI-TOF)  $m/z$ :  $[\text{M} + \text{Na}]^+$  Calcd for  $\text{C}_{26}\text{H}_{21}\text{N}_3\text{O}_6\text{Na}$  494.1328, found 494.1325.

**Methyl-4-ethyl-5-(3-methyl-4-nitroisoxazol-5-yl)-2'-oxospiro[cyclopentane-1,3'-indolin]-2-ene-2-carboxylate 4q:**

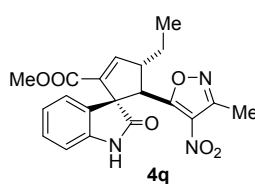

white solid, 32.2 mg, 84% yield, dr 15:1, m.p. 160–161 °C; <sup>1</sup>H NMR (600 MHz, CDCl<sub>3</sub>) δ (ppm) 8.53 (s, 1H), 7.21 (d, *J* = 2.1 Hz, 1H), 7.10 (td, *J* = 7.8, 1.2 Hz, 1H), 6.90 (d, *J* = 7.2 Hz, 1H), 6.83 (t, *J* = 7.8 Hz, 1H), 6.80 (d, *J* = 7.8 Hz, 1H), 4.67 (d, *J* = 7.8 Hz, 1H), 3.93 (qd, *J* = 7.2, 1.8 Hz, 1H), 3.58 (s, 3H), 2.35 (s, 3H), 1.87 – 1.80 (m, 1H), 1.75 – 1.68 (m, 1H), 1.00 (t, *J* = 7.2 Hz, 3H); <sup>13</sup>C NMR (150 MHz, CDCl<sub>3</sub>) δ (ppm) 179.1, 171.2, 162.7, 155.8, 149.2, 141.3, 134.9, 130.6, 129.4, 127.4, 124.3, 122.1, 110.1, 64.3, 52.0, 51.6, 49.7, 27.6, 12.2, 11.5; HRMS (ESI-TOF) *m/z*: [M + Na]<sup>+</sup> Calcd for C<sub>20</sub>H<sub>19</sub>N<sub>3</sub>O<sub>6</sub>Na 420.1172, found 420.1171.

**Methyl-5'-fluoro-5-(3-methyl-4-nitroisoxazol-5-yl)-2'-oxo-4-phenylspiro[cyclopentane-1,3'-indolin]-2-ene-2-carboxylate 4r:**

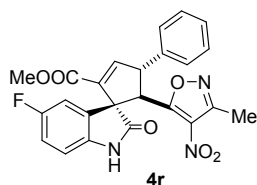

white solid, 30.7 mg, 80% yield, dr >19:1, m.p. >210 °C; <sup>1</sup>H NMR (600 MHz, CDCl<sub>3</sub>) δ (ppm) 8.54 (s, 1H), 7.37 – 7.35 (m, 4H), 7.32 – 7.30 (m, 1H), 7.21 (d, *J* = 1.8 Hz, 1H), 6.86 (dd, *J* = 8.4, 2.4 Hz, 1H), 6.84 – 6.83 (m, 1H), 6.77 (dd, *J* = 8.4, 4.2 Hz, 1H), 5.21 (dd, *J* = 9.0, 1.8 Hz, 1H), 4.99 (d, *J* = 9.0 Hz, 1H), 3.65 (s, 3H), 2.34 (s, 3H); <sup>13</sup>C NMR (150 MHz, CDCl<sub>3</sub>) δ (ppm) 178.7, 169.7, 162.4, 158.6 (d, *J*<sub>CF</sub> = 240.0 Hz), 155.9, 148.4, 139.4, 137.4, 136.1, 130.9, 129.4, 128.7 (d, *J*<sub>CF</sub> = 7.5 Hz), 128.3, 127.9, 116.1 (d, *J*<sub>CF</sub> = 23.3 Hz), 112.3 (d, *J*<sub>CF</sub> = 24.9 Hz), 110.9 (d, *J*<sub>CF</sub> = 8.1 Hz), 64.6, 55.2, 53.0, 52.3, 11.5; HRMS (ESI-TOF) *m/z*: [M + Na]<sup>+</sup> Calcd for C<sub>24</sub>H<sub>18</sub>FN<sub>3</sub>O<sub>6</sub>Na 486.1077, found 486.1080.

**Methyl-5'-chloro-5-(3-methyl-4-nitroisoxazol-5-yl)-2'-oxo-4-phenylspiro[cyclopentane-1,3'-indolin]-2-ene-2-carboxylate 4s:**

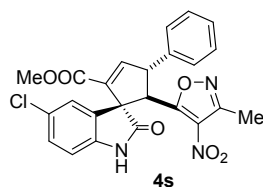

white solid, 31.4 mg, 82% yield, dr >19:1, m.p. >210 °C; <sup>1</sup>H NMR (600 MHz, CDCl<sub>3</sub>) δ (ppm) 8.47 (s, 1H), 7.38 – 7.36 (m, 4H), 7.33 – 7.30 (m, 1H), 7.21 (d, *J* = 2.4 Hz, 1H), 7.12 (dd, *J* =

8.4, 2.4 Hz, 1H), 7.05 (d,  $J = 1.8$  Hz, 1H), 6.76 (d,  $J = 8.4$  Hz, 1H), 5.22 (dd,  $J = 9.0$ , 1.8 Hz, 1H), 4.97 (d,  $J = 9.0$  Hz, 1H), 3.66 (s, 3H), 2.35 (s, 3H);  $^{13}\text{C}$  NMR (150 MHz,  $\text{CDCl}_3$ )  $\delta$  (ppm) 178.3, 169.6, 162.4, 155.9, 148.5, 139.9, 139.4, 136.0, 130.9, 129.6, 129.4, 128.9, 128.4, 127.9, 127.6, 124.8, 111.3, 64.3, 55.2, 53.0, 52.3, 11.5; HRMS (ESI-TOF)  $m/z$ :  $[\text{M} + \text{Na}]^+$  Calcd for  $\text{C}_{24}\text{H}_{18}\text{ClN}_3\text{O}_6\text{Na}$  502.0782, found 502.0780.

**Methyl-5'-methyl-5-(3-methyl-4-nitroisoxazol-5-yl)-2'-oxo-4-phenylspiro[cyclopentane-1,3'-indolin]-2-ene-2-carboxylate 4t:**

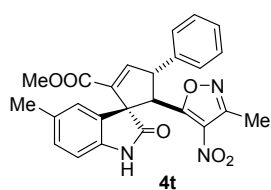

white solid, 30.7 mg, 80% yield, dr >19:1, m.p. 160–161 °C;  $^1\text{H}$  NMR (600 MHz,  $\text{CDCl}_3$ )  $\delta$  (ppm) 7.97 (s, 1H), 7.41 – 7.39 (m, 2H), 7.36 (t,  $J = 7.8$  Hz, 2H), 7.30 (t,  $J = 7.2$  Hz, 1H), 7.18 (d,  $J = 2.4$  Hz, 1H), 6.92 (d,  $J = 8.4$  Hz, 1H), 6.84 (s, 1H), 6.69 – 6.67 (m, 1H), 5.23 (dd,  $J = 8.4$ , 2.4 Hz, 1H), 4.98 (d,  $J = 9.0$  Hz, 1H), 3.64 (s, 3H), 2.32 (s, 3H), 2.22 (s, 3H);  $^{13}\text{C}$  NMR (100 MHz,  $\text{CDCl}_3$ )  $\delta$  (ppm) 178.5, 170.2, 162.6, 155.9, 147.9, 139.8, 138.7, 136.4, 131.8, 130.8, 129.8, 129.3, 128.2, 128.0, 127.2, 125.1, 109.7, 64.3, 55.4, 52.9, 52.2, 21.1, 11.5; HRMS (ESI-TOF)  $m/z$ :  $[\text{M} + \text{Na}]^+$  Calcd for  $\text{C}_{25}\text{H}_{21}\text{N}_3\text{O}_6\text{Na}$  482.1328, found 482.1330.

**Methyl-6'-fluoro-5-(3-methyl-4-nitroisoxazol-5-yl)-2'-oxo-4-phenylspiro[cyclopentane-1,3'-indolin]-2-ene-2-carboxylate 4u:**

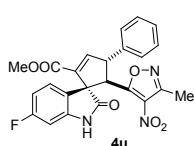

white solid, 29.9 mg, 78% yield, dr >19:1, m.p. 209–210 °C;  $^1\text{H}$  NMR (600 MHz,  $\text{CDCl}_3$ )  $\delta$  (ppm) 8.48 (s, 1H), 7.38 – 7.35 (m, 4H), 7.33 – 7.30 (m, 1H), 7.19 (d,  $J = 1.8$  Hz, 1H), 6.99 (d,  $J = 8.4$  Hz, 1H), 6.87 (dd,  $J = 7.8$ , 1.8 Hz, 1H), 6.84 (d,  $J = 1.8$  Hz, 1H), 5.22 (dd,  $J = 9.0$ , 2.4 Hz, 1H), 4.96 (d,  $J = 9.0$  Hz, 1H), 3.65 (s, 3H), 2.36 (s, 3H);  $^{13}\text{C}$  NMR (100 MHz,  $\text{CDCl}_3$ )  $\delta$  (ppm) 178.6, 169.8, 162.4, 156.0, 148.3, 142.5, 139.5, 136.1, 135.2, 130.9, 129.4, 128.3, 127.9, 125.6, 125.3, 122.4, 111.0, 63.8, 55.2, 53.1, 52.3, 11.6; HRMS (ESI-TOF)  $m/z$ :  $[\text{M} + \text{Na}]^+$  Calcd for  $\text{C}_{24}\text{H}_{18}\text{ClN}_3\text{O}_6\text{Na}$  502.0782, found 502.0785.

**Methyl-7'-fluoro-5-(3-methyl-4-nitroisoxazol-5-yl)-2'-oxo-4-phenylspiro[cyclopentane-1,3'-indolin]-2-ene-2-carboxylate 4v:**

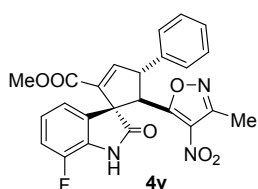

white solid, 28.8 mg, 75% yield, dr >19:1, m.p. >210 °C;  $^1\text{H}$

NMR (600 MHz, CDCl<sub>3</sub>)  $\delta$  (ppm) 8.10 (s, 1H), 7.39 – 7.34 (m, 4H), 7.32 – 7.29 (m, 1H), 7.19 (d,  $J$  = 1.8 Hz, 1H), 6.94 – 6.91 (m, 1H), 6.87 – 6.84 (m, 2H), 5.23 (dd,  $J$  = 9.0, 2.4 Hz, 1H), 4.98 (d,  $J$  = 9.0 Hz, 1H), 3.64 (s, 3H), 2.34 (s, 3H); <sup>13</sup>C NMR (100 MHz, CDCl<sub>3</sub>)  $\delta$  (ppm) 177.5, 169.9, 162.4, 156.0, 148.4, 146.8 (d,  $J_{CF}$  = 243.5 Hz), 139.5, 136.0, 130.9, 129.9 (d,  $J_{CF}$  = 2.3 Hz), 129.4, 128.7 (d,  $J_{CF}$  = 12.6 Hz), 128.3, 128.0, 122.9 (d,  $J_{CF}$  = 5.6 Hz), 120.1 (d,  $J_{CF}$  = 2.4 Hz), 116.72 (d,  $J_{CF}$  = 17.1 Hz), 64.4, 55.3, 53.1, 52.3, 11.5; HRMS (ESI-TOF)  $m/z$ : [M + Na]<sup>+</sup> Calcd for C<sub>24</sub>H<sub>18</sub>FN<sub>3</sub>O<sub>6</sub>Na 486.1077, found 486.1079.

**Methyl-7'-bromo-5-(3-methyl-4-nitroisoxazol-5-yl)-2'-oxo-4-phenylspiro[cyclopentane-1,3'-indolin]-2-ene-2-carboxylate 4w:**

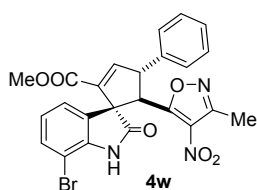

white solid, 27.6 mg, 72% yield, dr >19:1, m.p. >210 °C; <sup>1</sup>H NMR (600 MHz, CDCl<sub>3</sub>)  $\delta$  (ppm) 7.71 (s, 1H), 7.36 – 7.34 (m, 4H), 7.32 – 7.29 (m, 1H), 7.26 (bro, 1H), 7.18 (d,  $J$  = 2.4 Hz, 1H), 7.00 (d,  $J$  = 7.8 Hz, 1H), 6.79 (t,  $J$  = 7.8 Hz, 1H), 5.21 (dd,  $J$  = 9.0, 2.4 Hz, 1H), 4.97 (d,  $J$  = 8.4 Hz, 1H), 3.64 (s, 3H), 2.35 (s, 3H); <sup>13</sup>C NMR (100 MHz, CDCl<sub>3</sub>)  $\delta$  (ppm) 177.0, 169.7, 162.3, 156.0, 148.3, 140.7, 139.4, 136.1, 132.3, 130.9, 129.4, 128.4, 128.4, 128.0, 123.5, 123.3, 103.0, 65.4, 55.3, 53.2, 52.3, 11.6; HRMS (ESI-TOF)  $m/z$ : [M + Na]<sup>+</sup> Calcd for C<sub>24</sub>H<sub>18</sub>N<sub>3</sub>BrO<sub>6</sub>Na 546.0277, found 546.0280.

**Methyl-1'-benzyl-5-(3-methyl-4-nitroisoxazol-5-yl)-2'-oxo-4-phenylspiro[cyclopentane-1,3'-indolin]-2-ene-2-carboxylate 4x:**

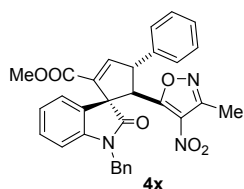

white solid, 34.5 mg, 90% yield, dr >19:1, m.p. 174–175 °C; <sup>1</sup>H NMR (600 MHz, CDCl<sub>3</sub>)  $\delta$  (ppm)  $\delta$  7.45 (dd,  $J$  = 8.4, 1.2 Hz, 2H), 7.41 (d,  $J$  = 7.2 Hz, 2H), 7.38 – 7.36 (m, 2H), 7.34 – 7.32 (m, 2H), 7.31 – 7.29 (m, 1H), 7.28 – 7.25 (m, 1H), 7.21 (d,  $J$  = 1.8 Hz, 1H), 7.06 (td,  $J$  = 7.8, 1.2 Hz, 1H), 7.01 (dd,  $J$  = 7.2, 1.2 Hz, 1H), 6.84 (td,  $J$  = 7.8, 1.2 Hz, 1H), 6.60 (d,  $J$  = 7.8 Hz, 1H), 5.26 – 5.23 (m, 2H), 5.01 (d,  $J$  = 7.8 Hz, 1H), 4.60 (d,  $J$  = 15.6 Hz, 1H), 3.53 (s, 3H), 2.29 (s, 3H); <sup>13</sup>C NMR (150 MHz, CDCl<sub>3</sub>)  $\delta$  (ppm) 177.1, 170.3, 162.3, 155.8, 148.3, 130.7, 129.3, 129.3, 128.7, 128.1, 128.0,



127.6, 127.5, 126.8, 123.9, 122.3, 109.3, 64.0, 55.6, 52.8, 51.9, 44.8, 11.4; HRMS (ESI-TOF)  $m/z$ :  $[M + Na]^+$  Calcd for  $C_{31}H_{25}N_3O_6Na$  558.1641, found 558.1644.

**Ethyl-5-(3-methyl-4-nitroisoxazol-5-yl)-2'-oxo-4-phenylspiro[cyclopentane-1,3'-indolin]-2-ene-2-carboxylate 4y:**

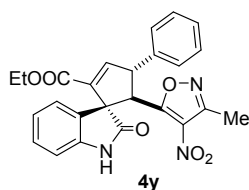

white solid, 33.3 mg, 87% yield, dr >19:1, m.p. >210 °C;  $^1H$  NMR (600 MHz,  $CDCl_3$ )  $\delta$  (ppm) 8.19 (s, 1H), 7.41 (d,  $J = 7.2$  Hz, 2H), 7.36 (t,  $J = 7.8$  Hz, 2H), 7.30 (t,  $J = 7.2$  Hz, 1H), 7.20 (d,  $J = 1.8$  Hz, 1H), 7.12 (t,  $J = 7.2$  Hz, 1H), 7.04 (d,  $J = 7.2$  Hz, 1H), 6.88 (t,  $J = 7.8$  Hz, 1H), 6.79 (d,  $J = 7.8$  Hz, 1H), 5.23 (dd,  $J = 9.0, 2.4$  Hz, 1H), 5.00 (d,  $J = 8.4$  Hz, 1H), 4.10 – 4.01 (m, 2H), 2.31 (s, 3H), 1.10 (t,  $J = 7.2$  Hz, 3H);  $^{13}C$  NMR (100 MHz,  $CDCl_3$ )  $\delta$  (ppm) 178.6, 170.2, 162.0, 155.8, 147.8, 141.2, 139.8, 136.5, 130.7, 129.4, 129.2, 128.1, 127.9, 127.3, 124.3, 122.2, 109.9, 64.2, 61.1, 55.3, 52.8, 13.8, 11.4; HRMS (ESI-TOF)  $m/z$ :  $[M + Na]^+$  Calcd for  $C_{25}H_{21}N_3O_6Na$  482.1328, found 482.1330.

**Methyl-5'-chloro-4-(4-isopropylphenyl)-5-(3-methyl-4-nitroisoxazol-5-yl)-2'-oxo-spiro[cyclopentane-1,3'-indolin]-2-ene-2-carboxylate 4z:**

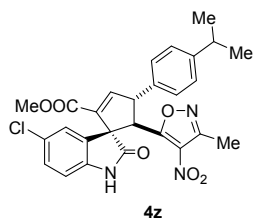

white solid, 31.44 mg, 82% yield, dr 18:1, m.p. 200–201 °C;  $^1H$  NMR (600 MHz,  $CDCl_3$ )  $\delta$  (ppm) 8.42 (s, 1H), 7.29 – 7.26 (m, 2H), 7.21 (d,  $J = 7.8$  Hz, 2H), 7.19 (d,  $J = 1.8$  Hz, 1H), 7.11 (dd,  $J = 8.4, 1.8$  Hz, 1H), 7.04 (d,  $J = 1.8$  Hz, 1H), 6.75 (d,  $J = 8.4$  Hz, 1H), 5.20 (dd,  $J = 9.0, 1.8$  Hz, 1H), 4.95 (d,  $J = 9.0$  Hz, 1H), 3.65 (s, 3H), 2.89 (dt,  $J = 13.8, 7.2$  Hz, 1H), 2.35 (s, 3H), 1.24 (d,  $J = 1.2$  Hz, 3H), 1.23 (d,  $J = 1.2$  Hz, 3H);  $^{13}C$  NMR (150 MHz,  $CDCl_3$ )  $\delta$  (ppm) 178.2, 169.7, 162.3, 155.8, 149.0, 148.7, 139.8, 136.6, 135.7, 130.9, 129.4, 128.9, 127.8, 127.4, 127.3, 124.7, 111.1, 64.2, 55.1, 52.6, 52.2, 33.8, 23.9, 11.5; HRMS (ESI-TOF)  $m/z$ :  $[M + Na]^+$  Calcd for  $C_{27}H_{24}ClN_3O_6Na$  544.1251, found 544.1248.

**Methyl-5'-bromo-4-(4-isopropylphenyl)-5-(3-methyl-4-nitroisoxazol-5-yl)-2'-oxo-spiro[cyclopentane-1,3'-indolin]-2-ene-2-carboxylate 4aa:**

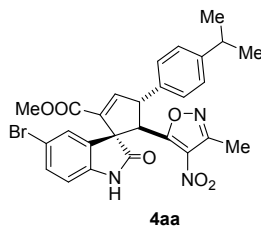

white solid, 30.7 mg, 80% yield, dr >19:1, m.p. >210 °C; <sup>1</sup>H NMR (600 MHz, CDCl<sub>3</sub>) δ (ppm) 8.54 (s, 1H), 7.29 (d, *J* = 7.8 Hz, 2H), 7.26 – 7.24 (m, 1H), 7.21 (d, *J* = 7.8 Hz, 2H), 7.19 (d, *J* = 2.4 Hz, 1H), 7.18 (d, *J* = 1.8 Hz, 1H), 6.72 (d, *J* = 8.3 Hz, 1H), 5.20 (dd, *J* = 9.0, 2.4 Hz, 1H), 4.95 (d, *J* = 9.0 Hz, 1H), 3.65 (s, 3H), 2.89 (dt, *J* = 13.8, 7.2 Hz, 1H), 2.35 (s, 3H), 1.24 (d, *J* = 1.8 Hz, 3H), 1.23 (d, *J* = 1.8 Hz, 3H); <sup>13</sup>C NMR (150 MHz, CDCl<sub>3</sub>) δ (ppm) 178.3, 169.8, 162.4, 155.9, 149.1, 148.8, 140.4, 136.7, 135.7, 132.4, 131.0, 129.4, 127.9, 127.5, 127.4, 114.7, 111.7, 64.3, 55.2, 52.7, 52.3, 33.9, 24.0, 24.0, 11.5; HRMS (ESI-TOF) *m/z*: [M + Na]<sup>+</sup> Calcd for C<sub>27</sub>H<sub>24</sub>BrN<sub>3</sub>O<sub>6</sub>Na 588.0746, found 588.0745.

**Methyl-6'-chloro-4-(4-isopropylphenyl)-5-(3-methyl-4-nitroisoxazol-5-yl)-2'-oxo-spiro[cyclopentane-1,3'-indolin]-2-ene-2-carboxylate 4ab:**

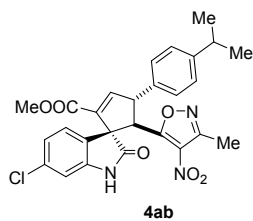

white solid, 29.1 mg, 76% yield, dr 15:1, m.p. 203–204 °C; <sup>1</sup>H NMR (600 MHz, CDCl<sub>3</sub>) δ (ppm) 8.63 (s, 1H), 7.29 (d, *J* = 7.8 Hz, 2H), 7.21 (d, *J* = 8.4 Hz, 2H), 7.19 (d, *J* = 1.8 Hz, 1H), 6.99 (d, *J* = 8.4 Hz, 1H), 6.86 (dd, *J* = 7.8, 1.8 Hz, 1H), 6.85 (d, *J* = 1.2 Hz, 1H), 5.20 (dd, *J* = 9.0, 1.8 Hz, 1H), 4.95 (d, *J* = 9.0 Hz, 1H), 3.64 (s, 3H), 2.89 (dt, *J* = 13.8, 7.2 Hz, 1H), 2.35 (s, 3H), 1.24 (d, *J* = 1.2 Hz, 3H), 1.23 (d, *J* = 1.2 Hz, 3H); <sup>13</sup>C NMR (150 MHz, CDCl<sub>3</sub>) δ (ppm) 178.7, 169.9, 162.4, 155.9, 149.0, 148.6, 142.5, 136.7, 135.7, 135.0, 130.9, 127.7, 127.4, 125.6, 125.2, 122.2, 110.9, 63.7, 55.1, 52.6, 52.2, 33.8, 23.9, 23.9, 11.5; HRMS (ESI-TOF) *m/z*: [M + Na]<sup>+</sup> Calcd for C<sub>27</sub>H<sub>24</sub>ClN<sub>3</sub>O<sub>6</sub>Na 544.1251, found 544.1254.

**Methyl-6'-bromo-4-(4-isopropylphenyl)-5-(3-methyl-4-nitroisoxazol-5-yl)-2'-oxo-spiro[cyclopentane-1,3'-indolin]-2-ene-2-carboxylate 4ac:**

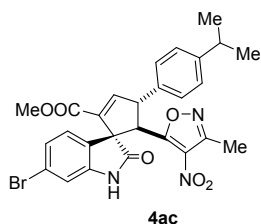

white solid, 29.9 mg, 78% yield, dr 15:1, m.p. >210 °C; <sup>1</sup>H NMR (600 MHz, CDCl<sub>3</sub>) δ (ppm) 8.52 (s, 1H), 7.28 (d, *J* = 8.4 Hz, 2H), 7.21 (d, *J* = 8.4 Hz, 2H), 7.18 (d, *J* = 2.4 Hz, 1H), 7.02 (dd, *J* =

7.8, 1.8 Hz, 1H), 6.99 (d,  $J = 1.8$  Hz, 1H), 6.93 (d,  $J = 8.4$  Hz, 1H), 5.20 (dd,  $J = 9.0$ , 2.4 Hz, 1H), 4.94 (d,  $J = 9.0$  Hz, 1H), 3.64 (s, 3H), 2.89 (dt,  $J = 13.8$ , 7.2 Hz, 1H), 2.36 (s, 3H), 1.24 (d,  $J = 1.8$  Hz, 3H), 1.22 (d,  $J = 1.8$  Hz, 3H);  $^{13}\text{C}$  NMR (150 MHz,  $\text{CDCl}_3$ )  $\delta$  (ppm) 178.6, 170.0, 162.5, 156.0, 149.1, 148.7, 142.6, 136.8, 135.8, 131.0, 127.9, 127.5, 126.3, 125.6, 125.2, 123.1, 113.8, 63.9, 55.1, 52.7, 52.3, 33.9, 24.0, 24.0, 11.6; HRMS (ESI-TOF)  $m/z$ :  $[\text{M} + \text{Na}]^+$  Calcd for  $\text{C}_{27}\text{H}_{24}\text{BrN}_3\text{O}_6\text{Na}$  588.0746, found 588.0743.

## 5. Gram-scale synthesis of products 4a

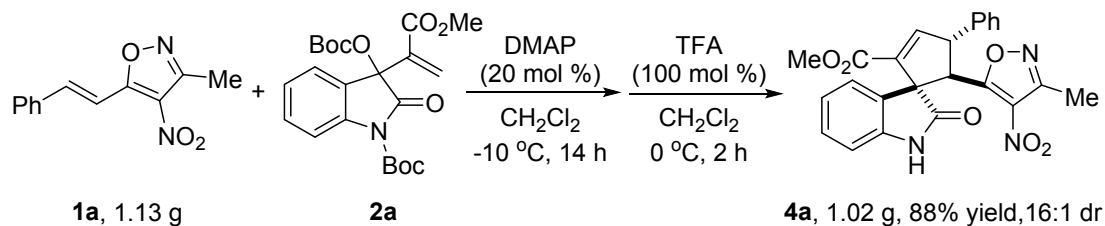

**Scheme S1** Gram-scale synthesis of isoxazole-containing spirooxindole cyclopentene derivatives.

A gram-scale mixture of MBH carbonate **1a** (4.9 mmol, 1.13 g) with 4-nitro-5-alkenylisoxazole **2a** (5.4 mmol, 2.34 g) was added dimethylaminopyridine (DMAP, 20 mol%) in dichloromethane (3.0 mL) at -10 °C. The reaction mixture was stirred at -10 °C for about 8 hours. After the consumption of MBH carbonate **1a**, the mixture was stirred at -10 °C followed by addition of trifluoroacetic acid (TFA, 100 mol% in 1.0 mL DCM) and then moved to room temperature for about 2 hours. The mixture was stirred until the reaction had stopped progressing as observed by TLC analysis, then diluted with EtOAc and washed with saturated aqueous NaHCO<sub>3</sub>, and brine. Then the solution was concentrated and the residue was purified by flash chromatography on silica gel (petroleum ether/ethyl acetate = 5:1 to 3:1) to afford 1.02 g of the diastereochemical outcome **4a**.

## 6. Crystal data of 4g

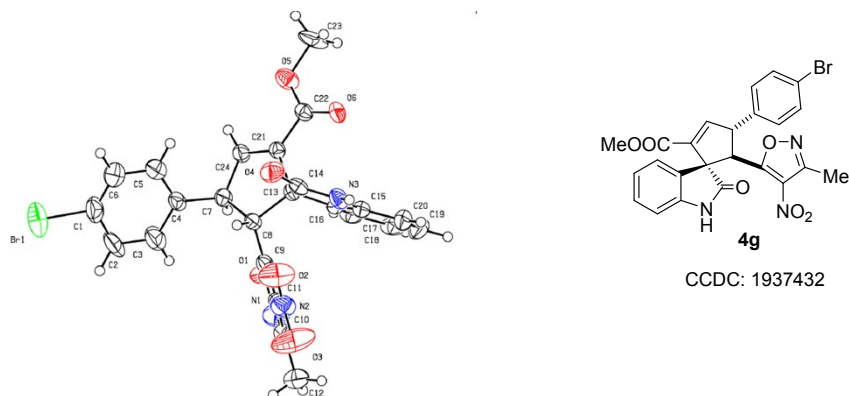

**Figure S1** X-ray crystal structure of **4g**. The thermal ellipsoids are drawn at a 50% probability level.

Single crystals suitable for XRD were obtained by vapor diffusion experiment: compound **4g** was dissolved in 0.5 mL dichloromethane and 1.0 mL methanol in a glass vial, which was then placed in sealed glass container. Crystals were obtained in about 4-5 days.

|                                       |                                                                 |
|---------------------------------------|-----------------------------------------------------------------|
| Identification code                   | XX                                                              |
| Empirical formula                     | C <sub>24</sub> H <sub>18</sub> BrN <sub>3</sub> O <sub>6</sub> |
| Formula weight                        | 524.31                                                          |
| Temperature/K                         | 150                                                             |
| Crystal system                        | orthorhombic                                                    |
| Space group                           | Cmce                                                            |
| a/Å                                   | 8.7145(16)                                                      |
| b/Å                                   | 15.395(3)                                                       |
| c/Å                                   | 34.142(6)                                                       |
| $\alpha$ /°                           | 90                                                              |
| $\beta$ /°                            | 90                                                              |
| $\gamma$ /°                           | 90                                                              |
| Volume/Å <sup>3</sup>                 | 4580.5(15)                                                      |
| Z                                     | 8                                                               |
| $\rho_{\text{calc}}$ /cm <sup>3</sup> | 1.521                                                           |
| $\mu$ /mm <sup>-1</sup>               | 1.841                                                           |
| F(000)                                | 2128.0                                                          |
| Crystal size/mm <sup>3</sup>          | ? × ? × ?                                                       |
| Radiation                             | MoK $\alpha$ ( $\lambda$ = 0.71073)                             |

|                                                  |                                                                   |
|--------------------------------------------------|-------------------------------------------------------------------|
| 2 $\theta$ range for data collection/ $^{\circ}$ | 5.502 to 55.04                                                    |
| Index ranges                                     | $-9 \leq h \leq 11$ , $-19 \leq k \leq 20$ , $-43 \leq l \leq 42$ |
| Reflections collected                            | 17773                                                             |
| Independent reflections                          | 2743 [ $R_{\text{int}} = 0.0562$ , $R_{\text{sigma}} = 0.0460$ ]  |
| Data/restraints/parameters                       | 2743/0/292                                                        |
| Goodness-of-fit on $F^2$                         | 1.032                                                             |
| Final R indexes [ $I \geq 2\sigma(I)$ ]          | $R_1 = 0.0509$ , $wR_2 = 0.0965$                                  |
| Final R indexes [all data]                       | $R_1 = 0.1073$ , $wR_2 = 0.1162$                                  |
| Largest diff. peak/hole / $e \text{ \AA}^{-3}$   | 0.35/-0.39                                                        |

## 7. NMR spectra

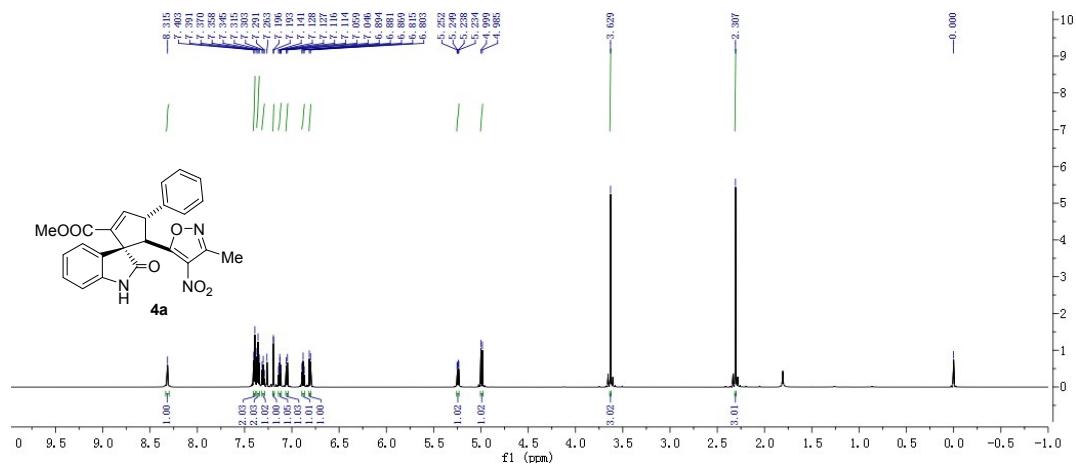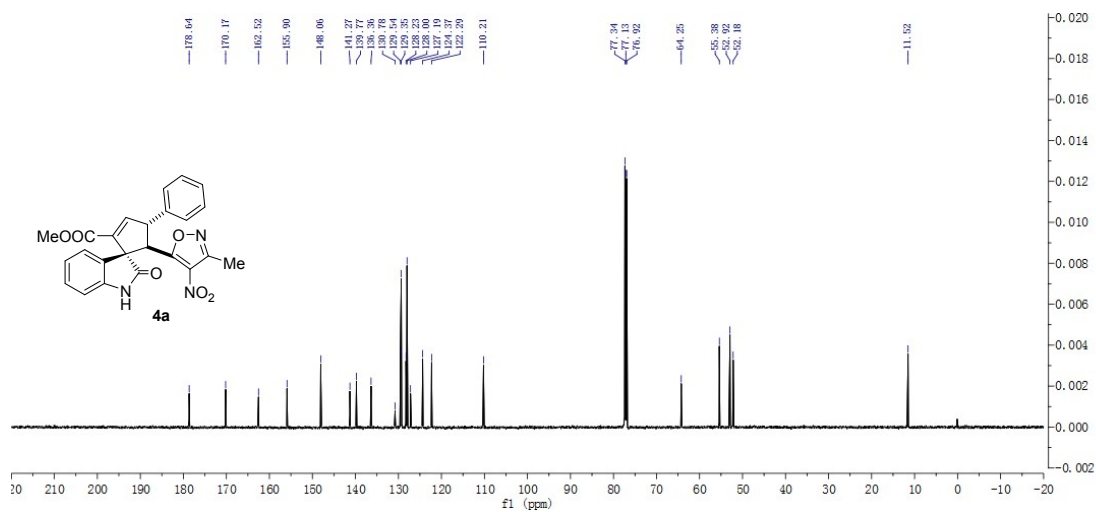

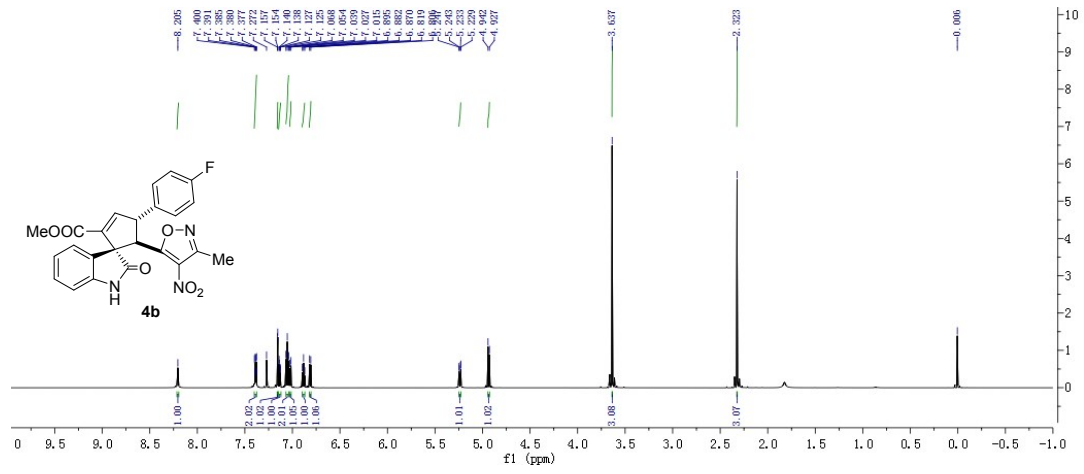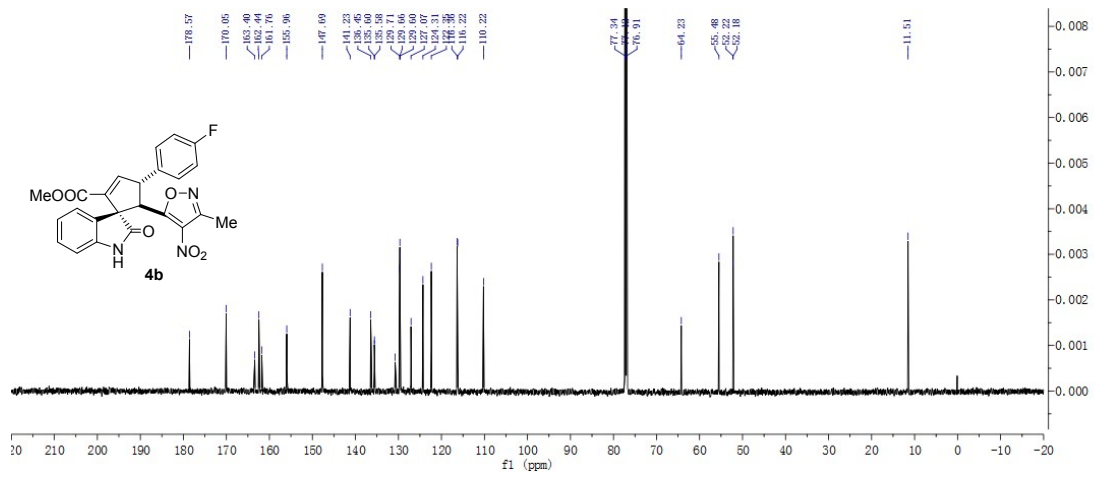



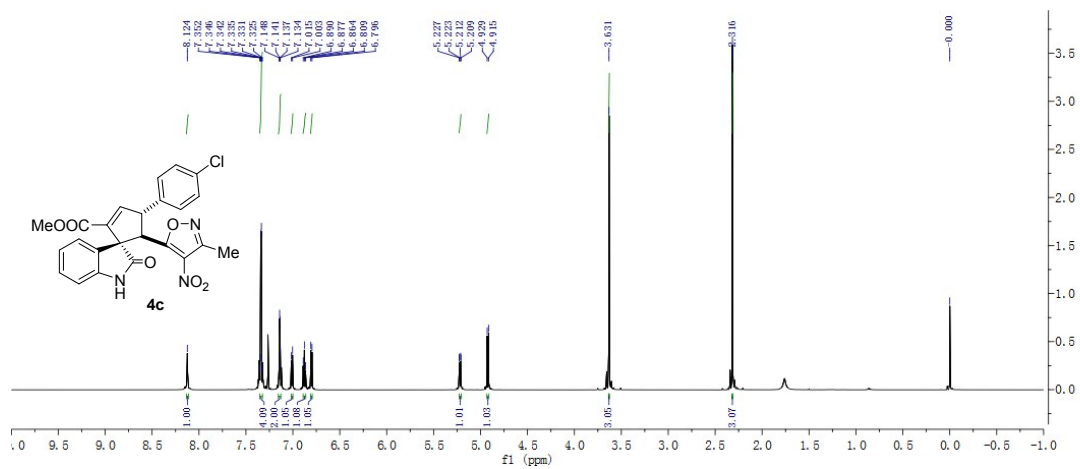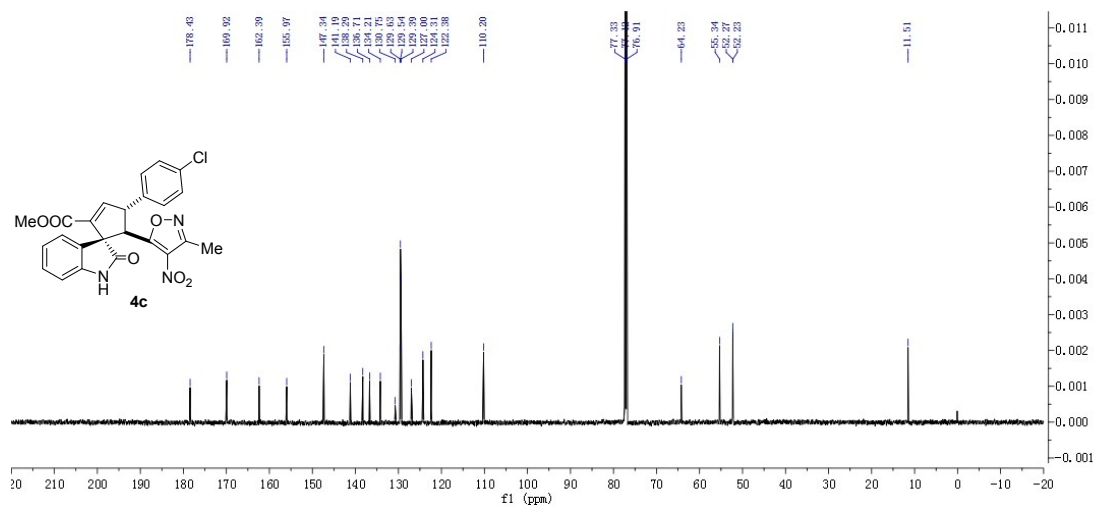

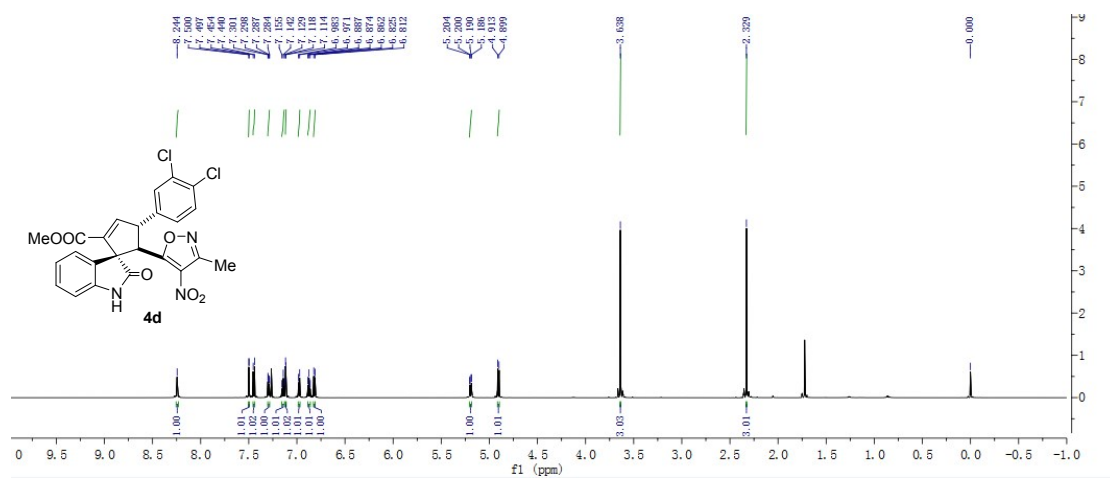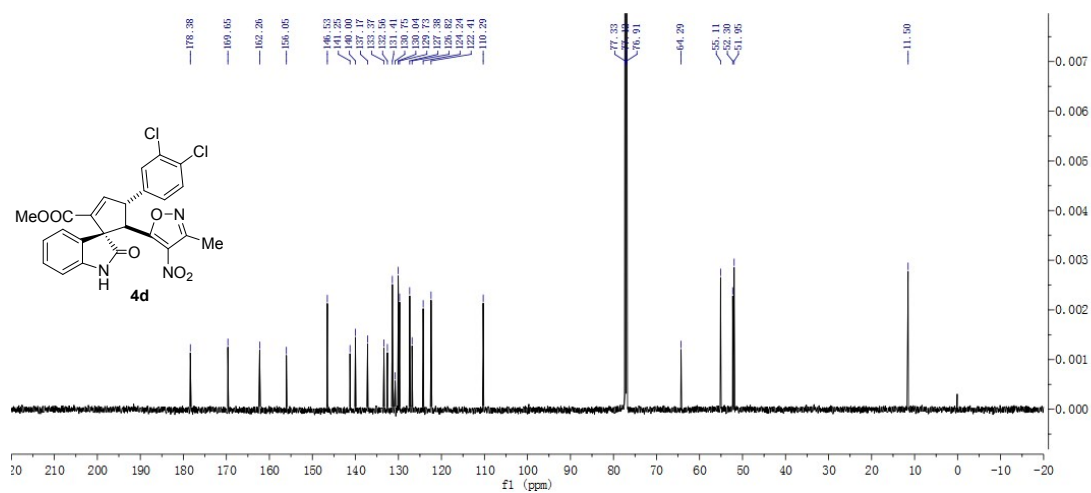

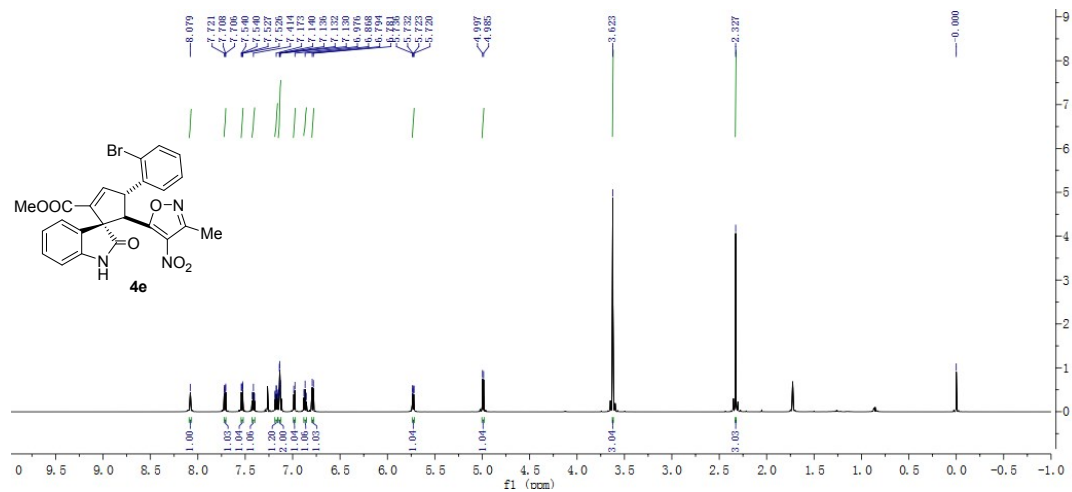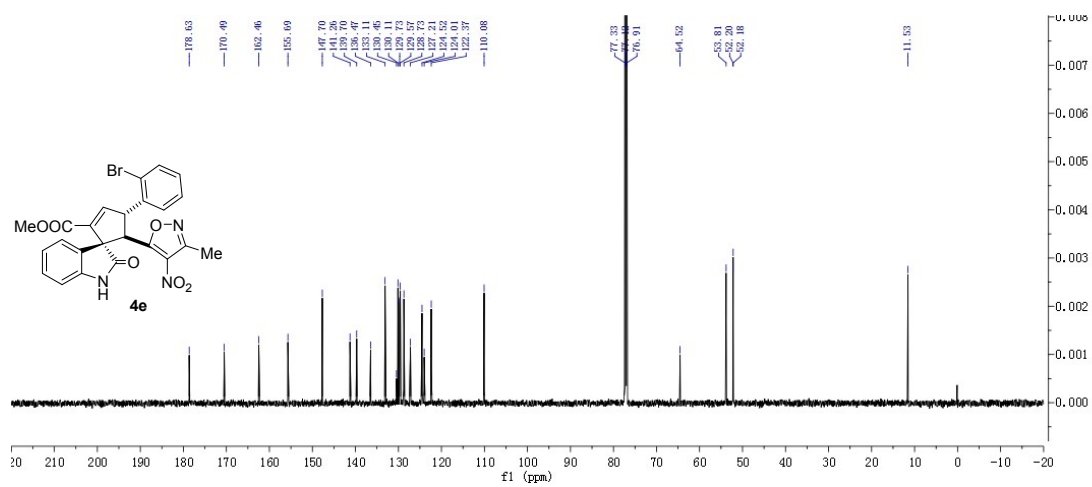

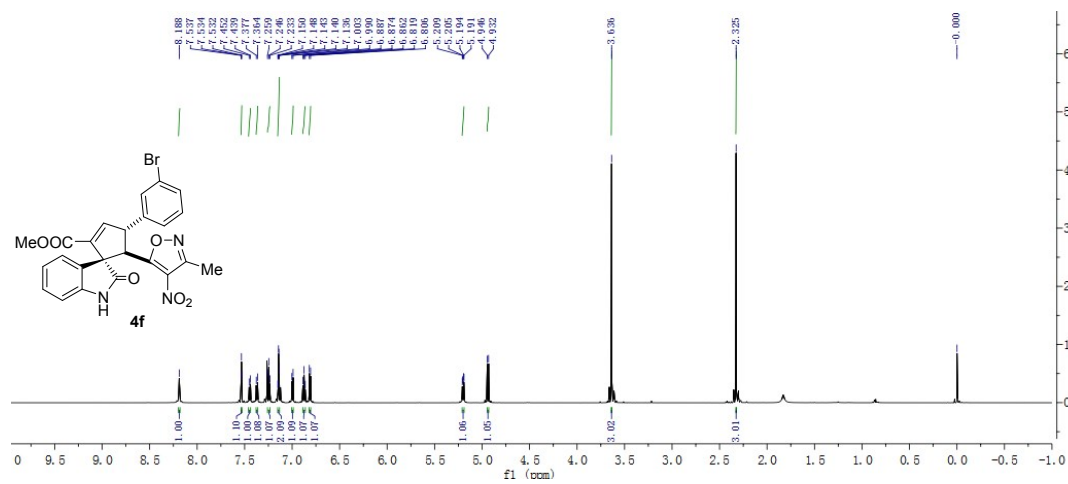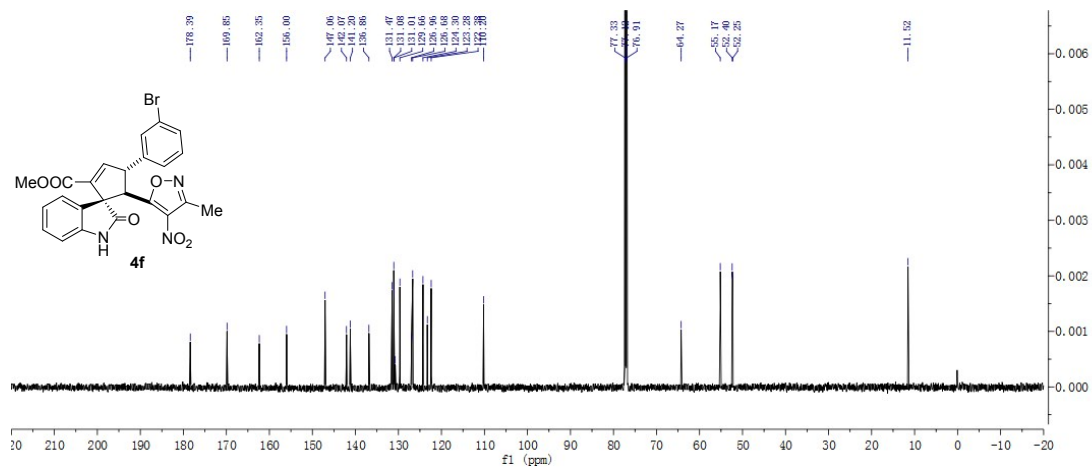

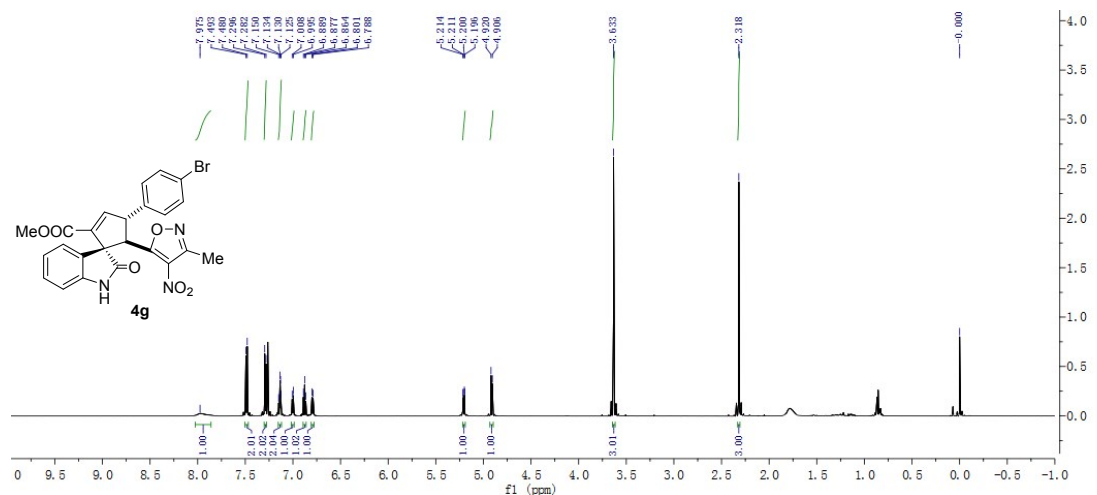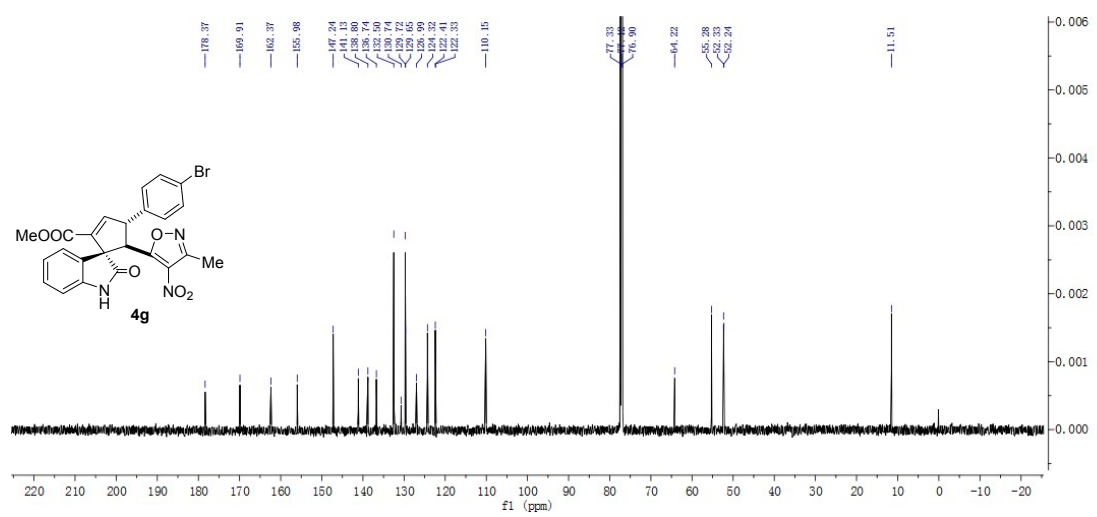

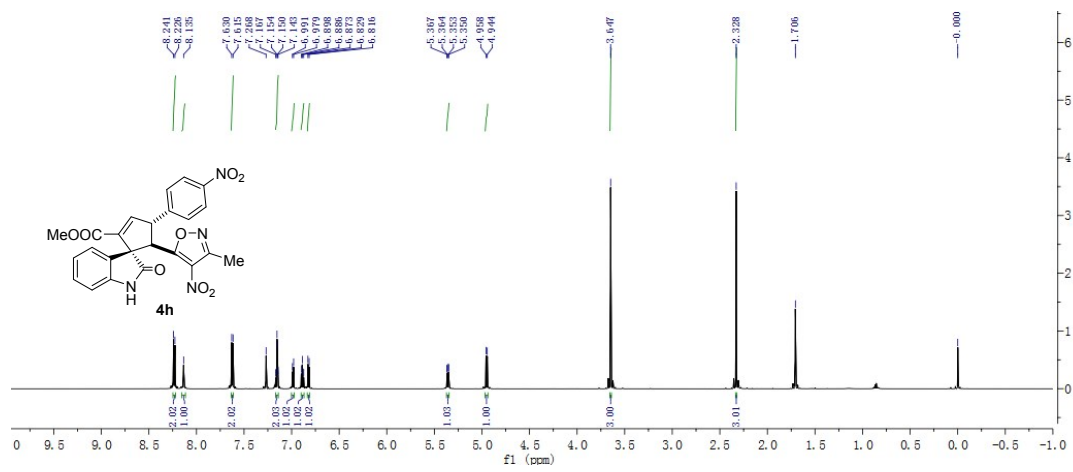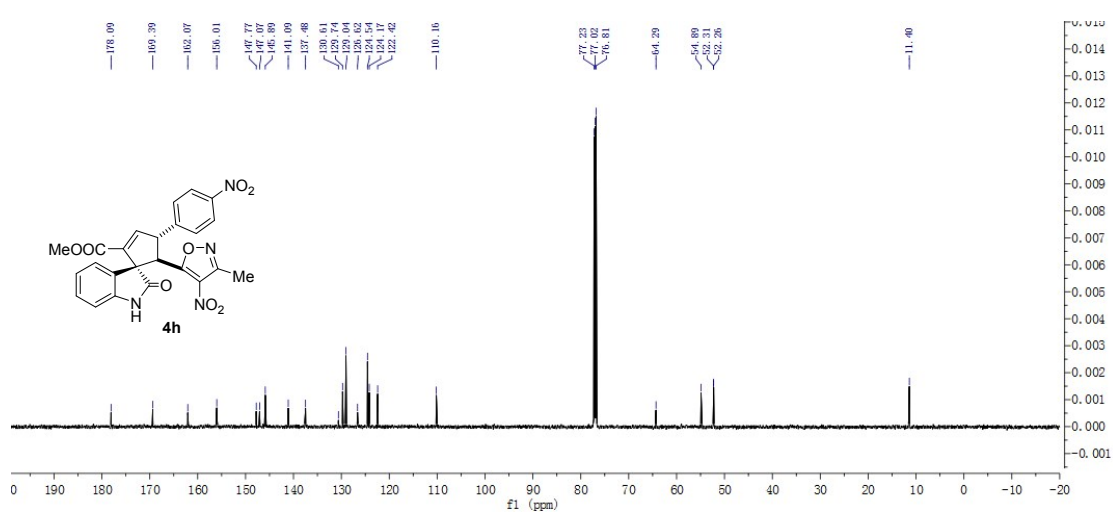

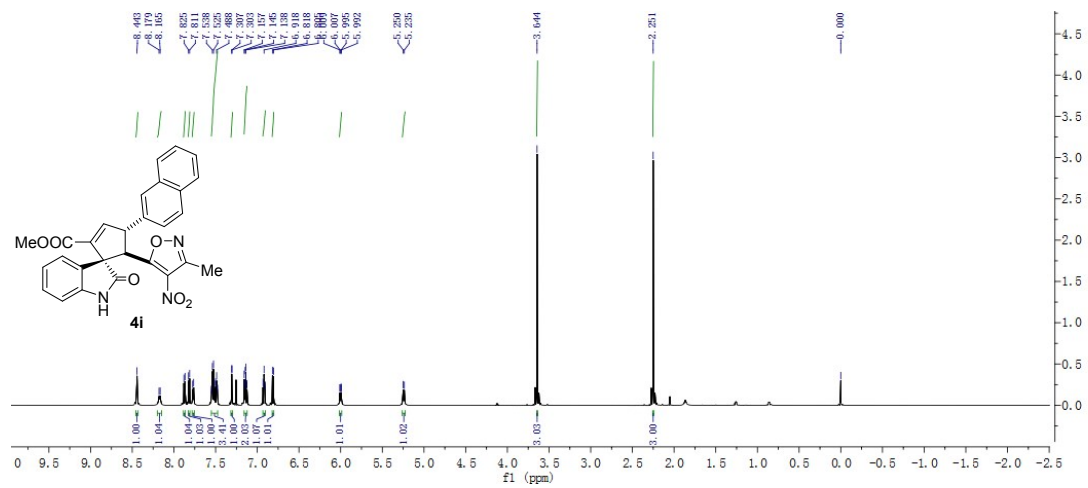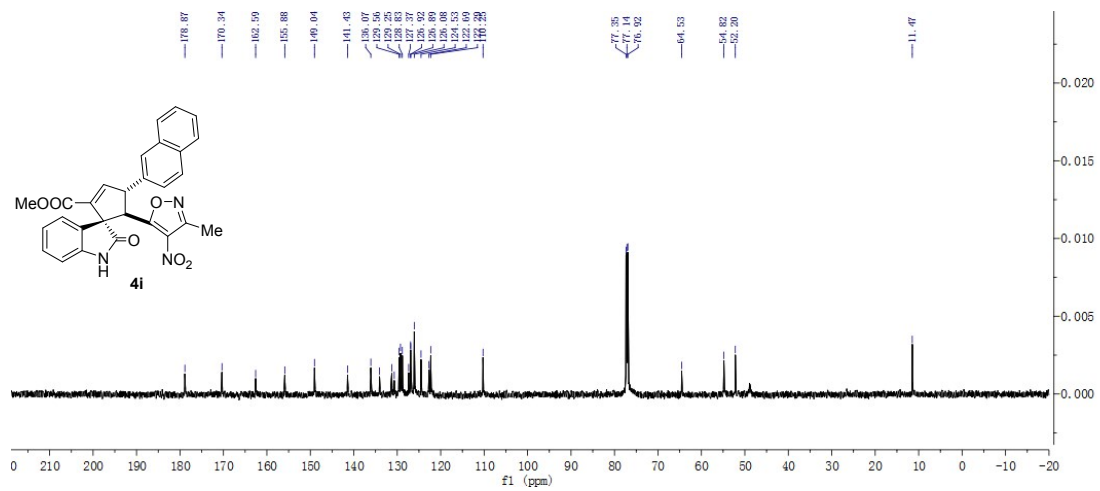

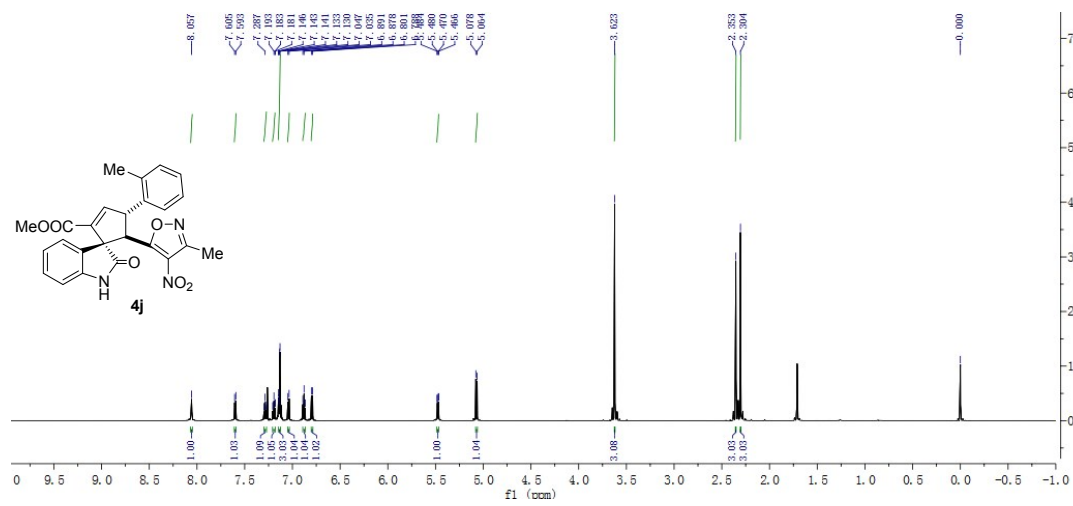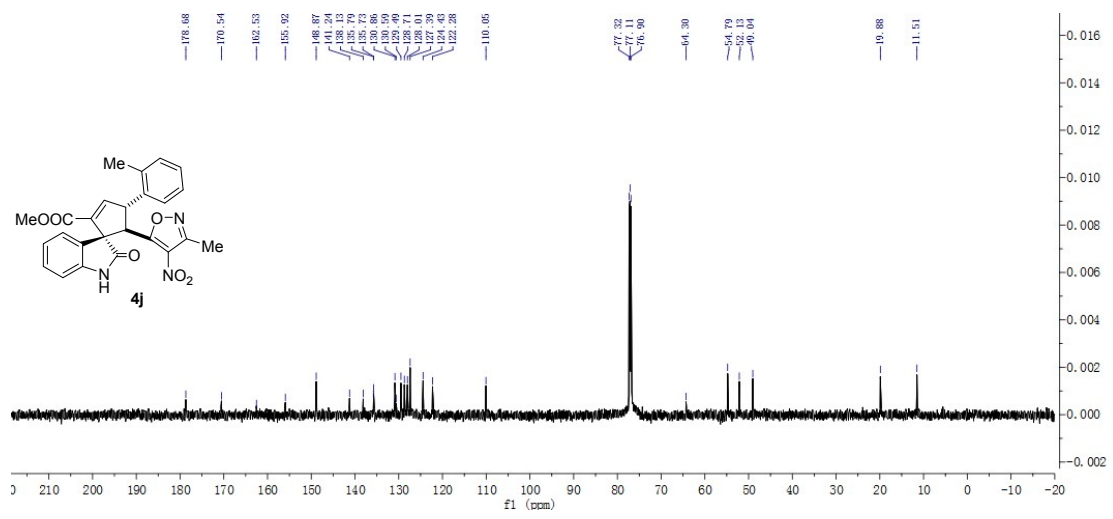



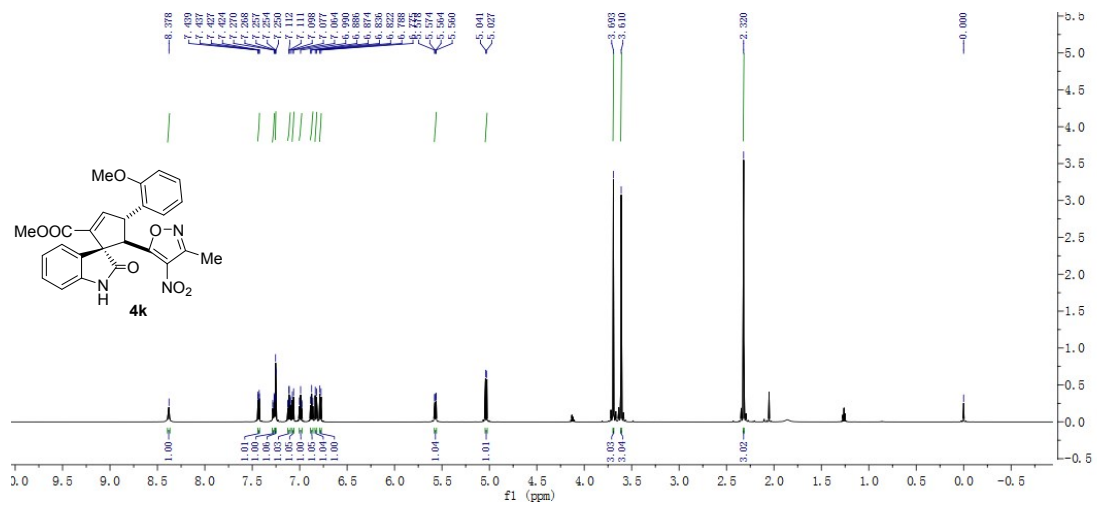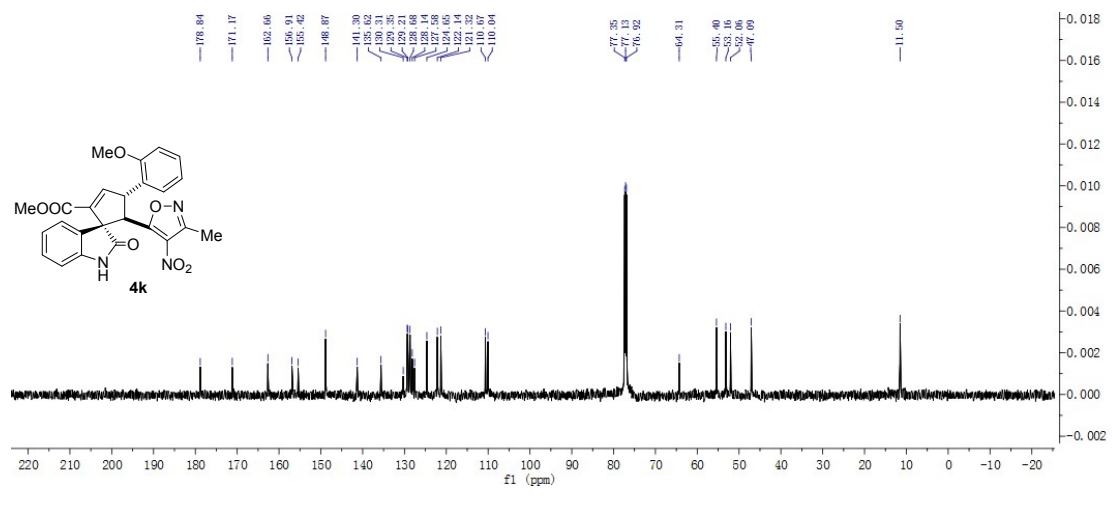

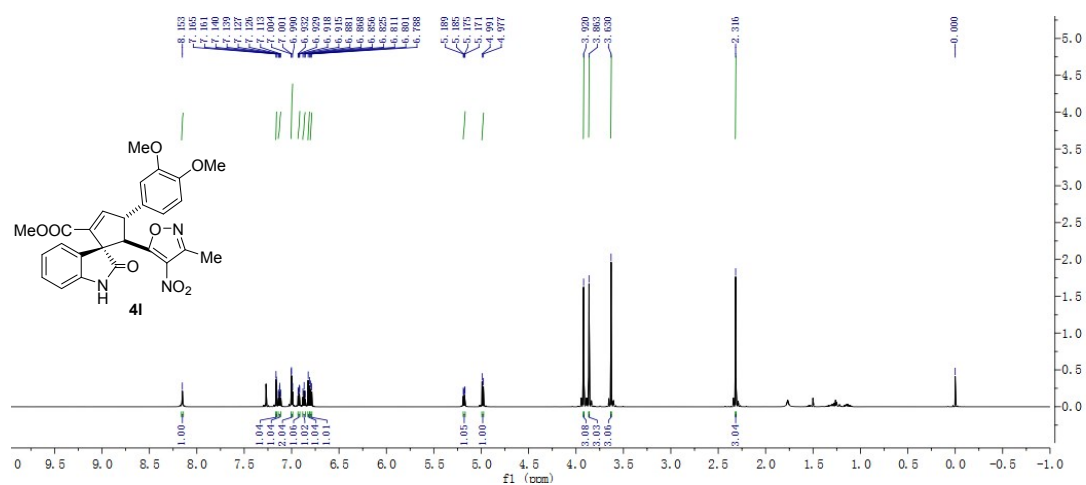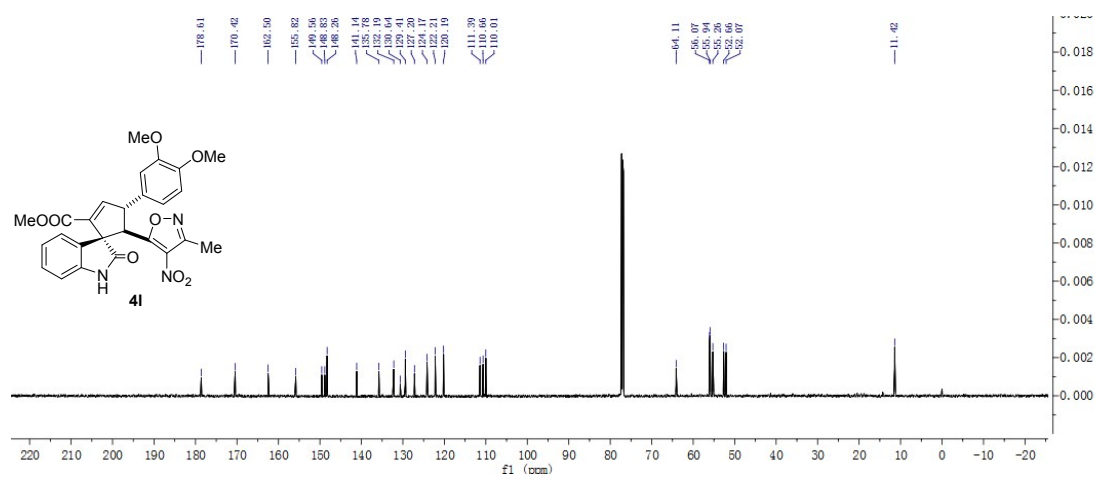

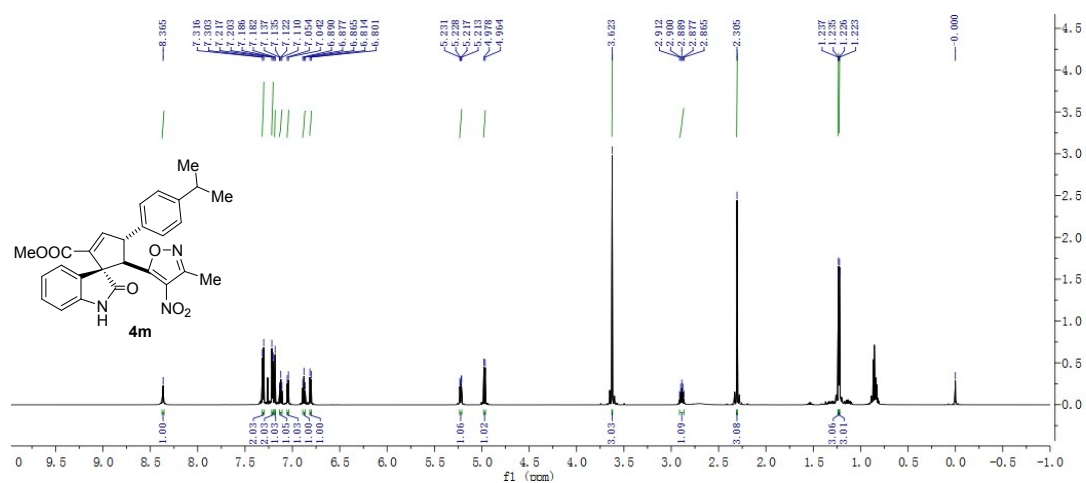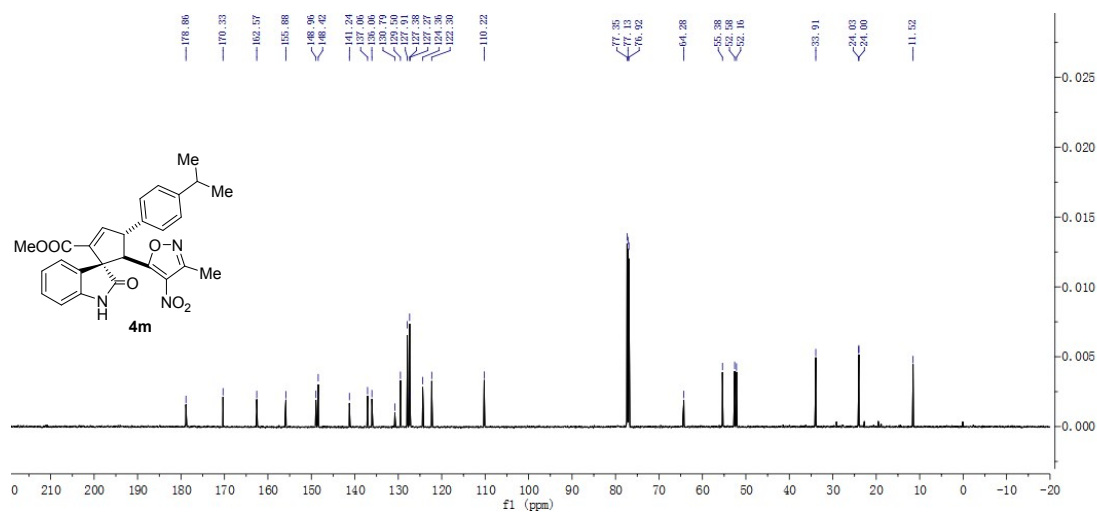

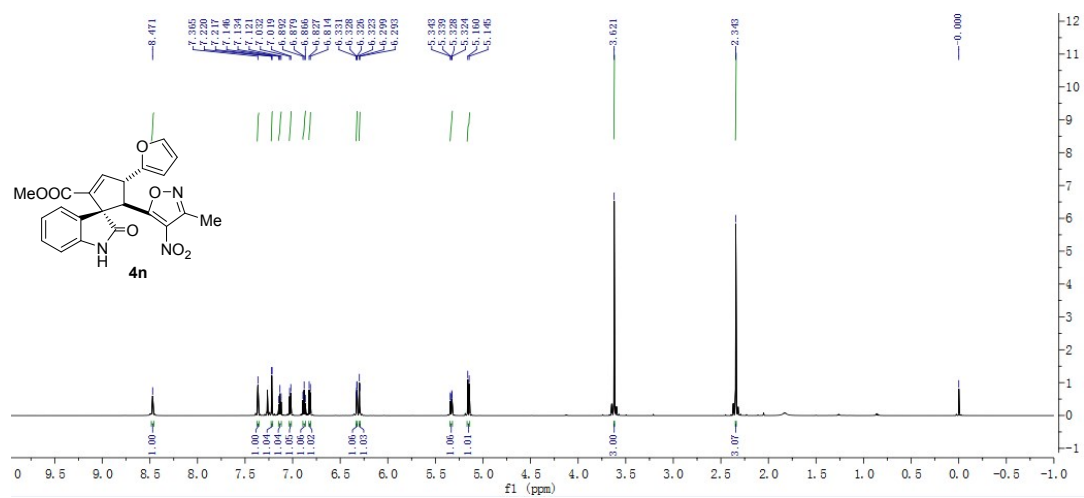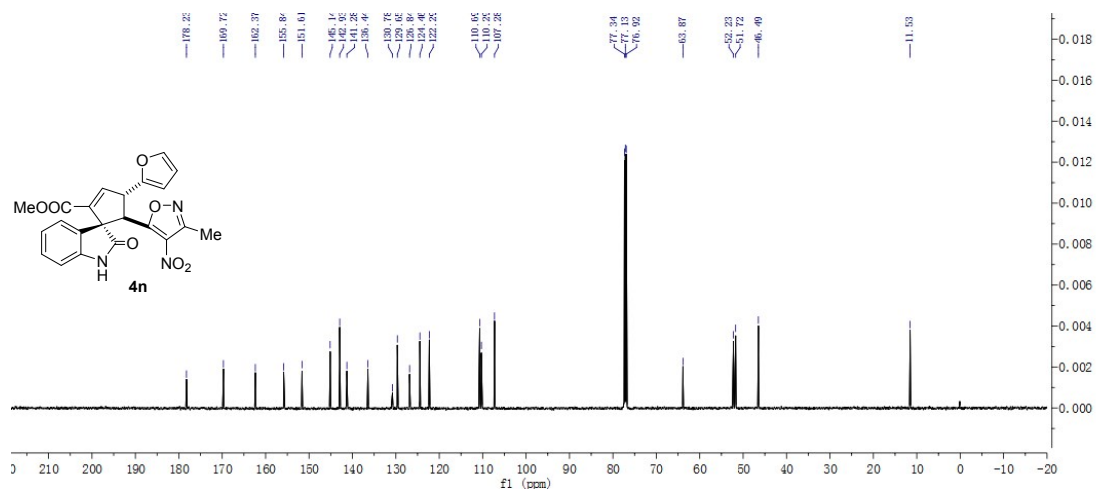

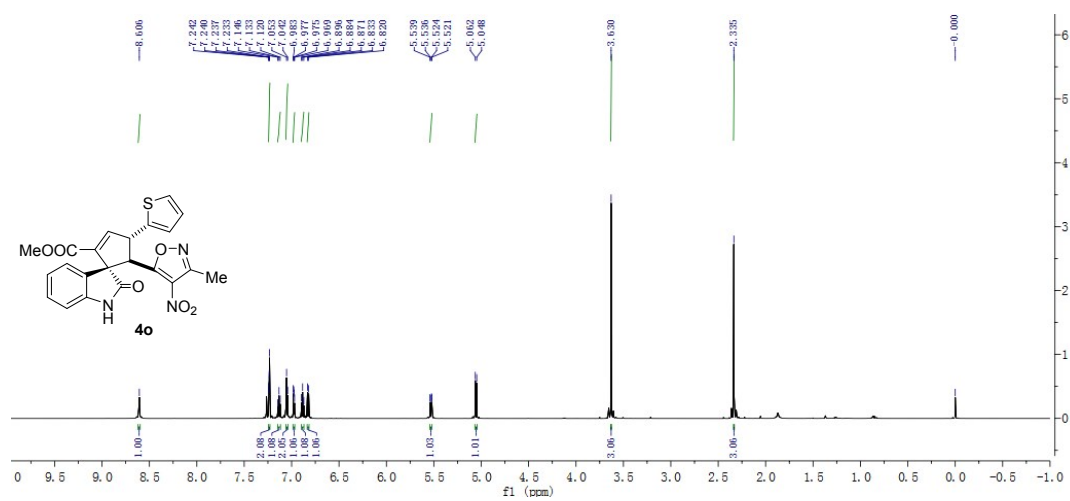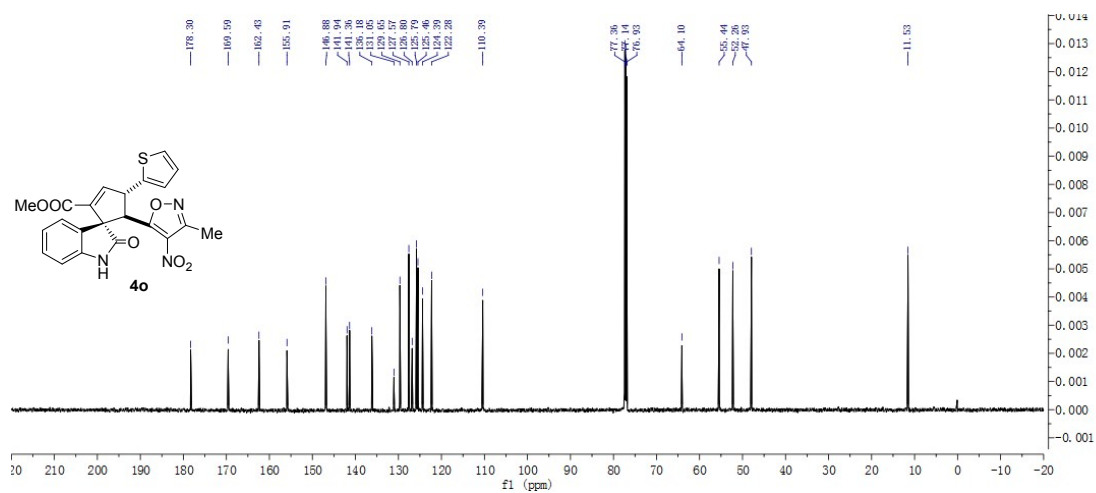

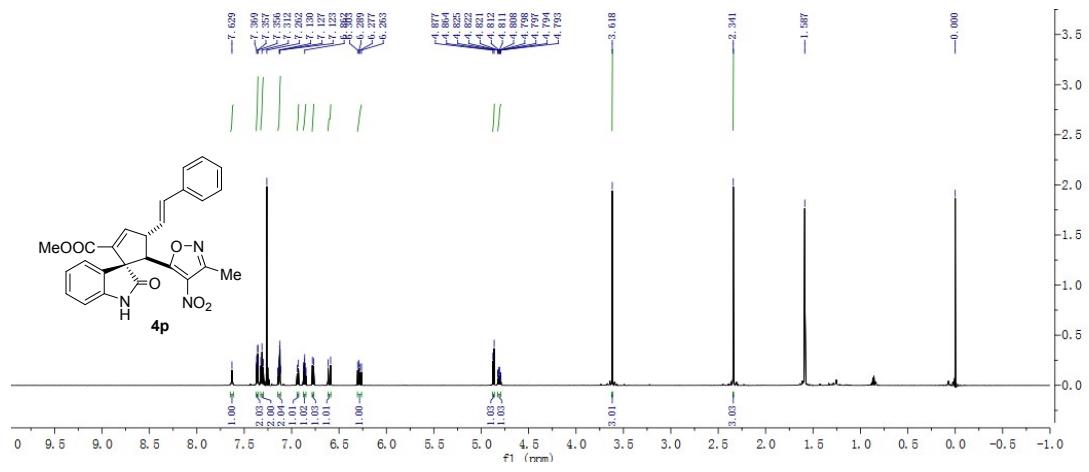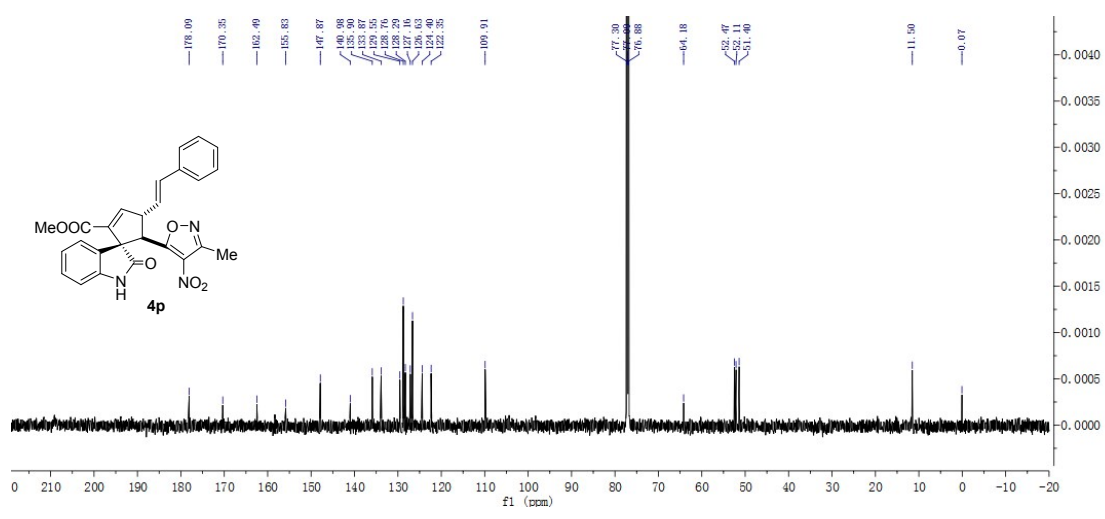

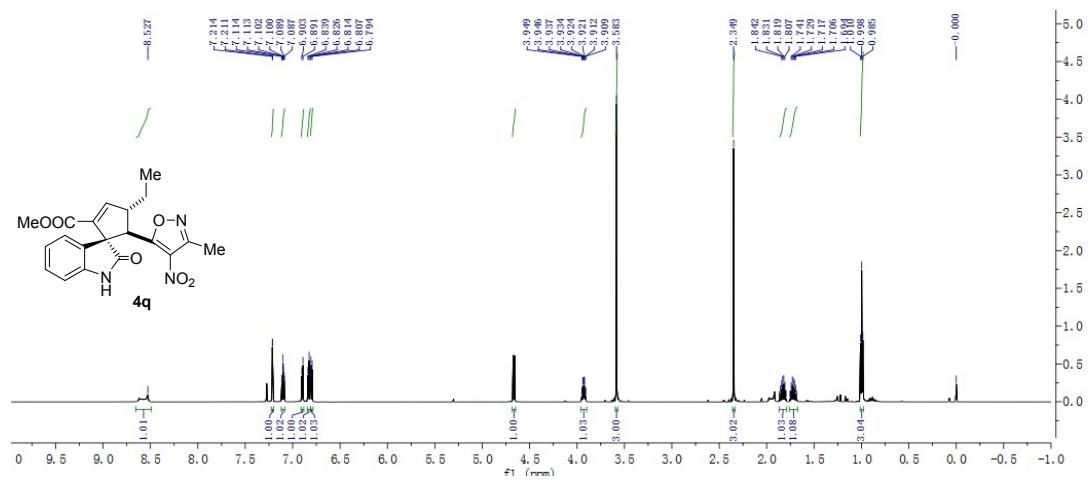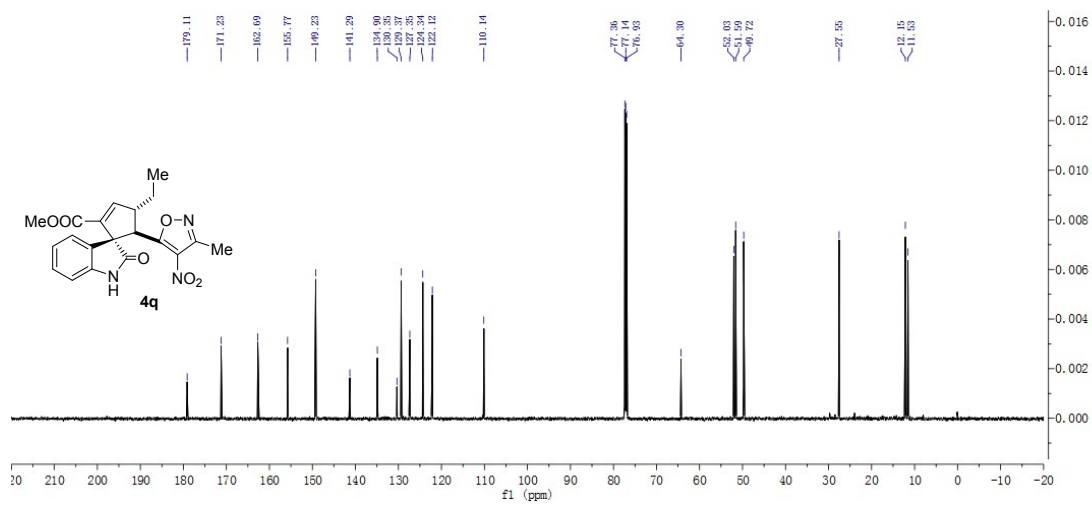

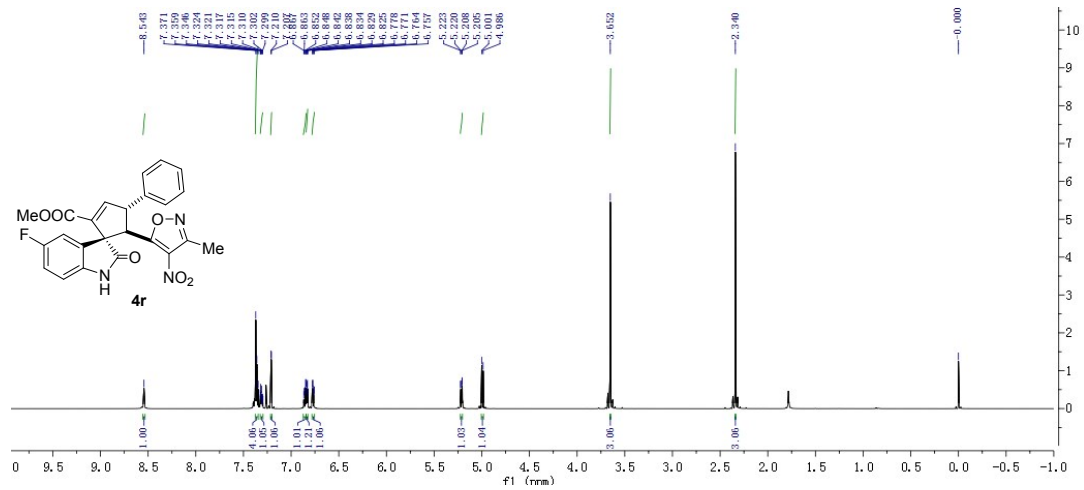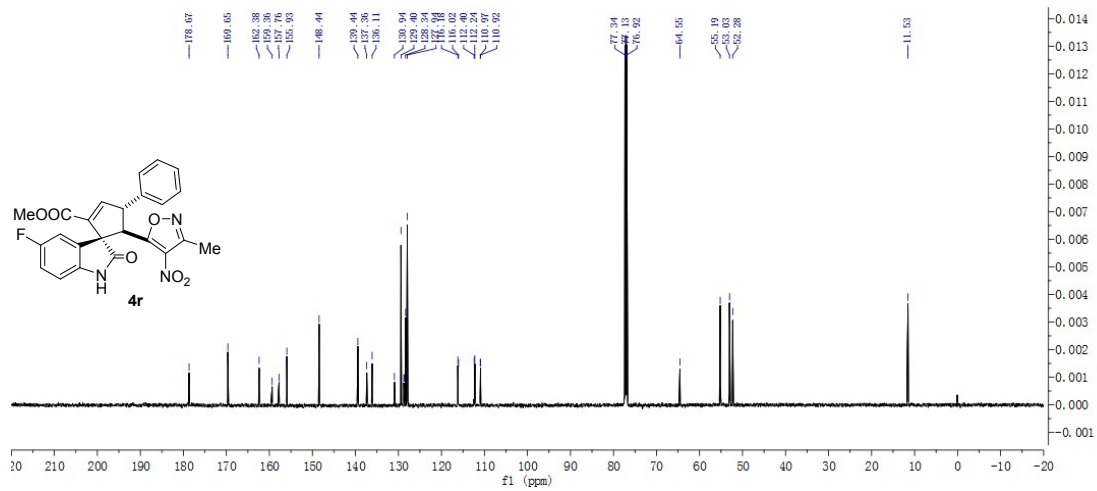



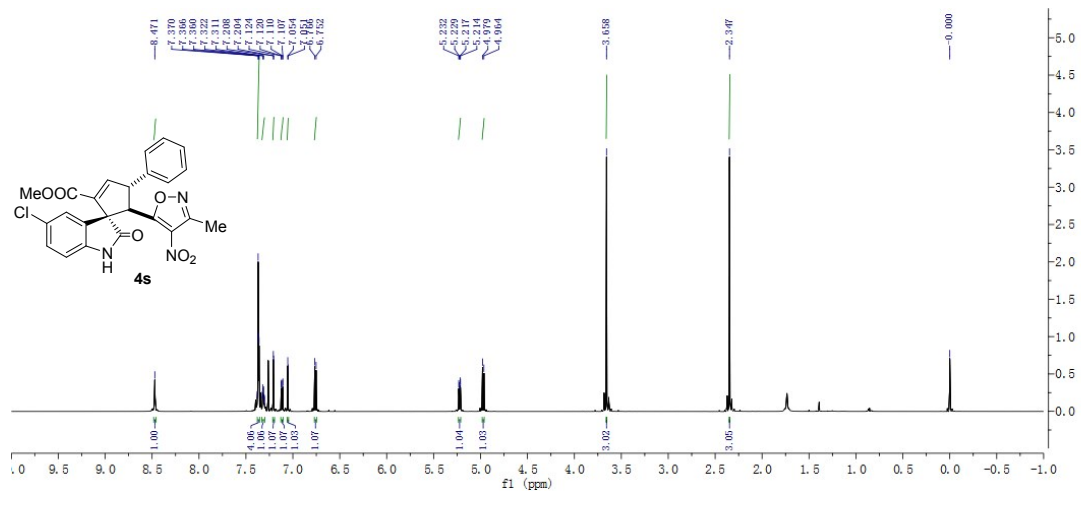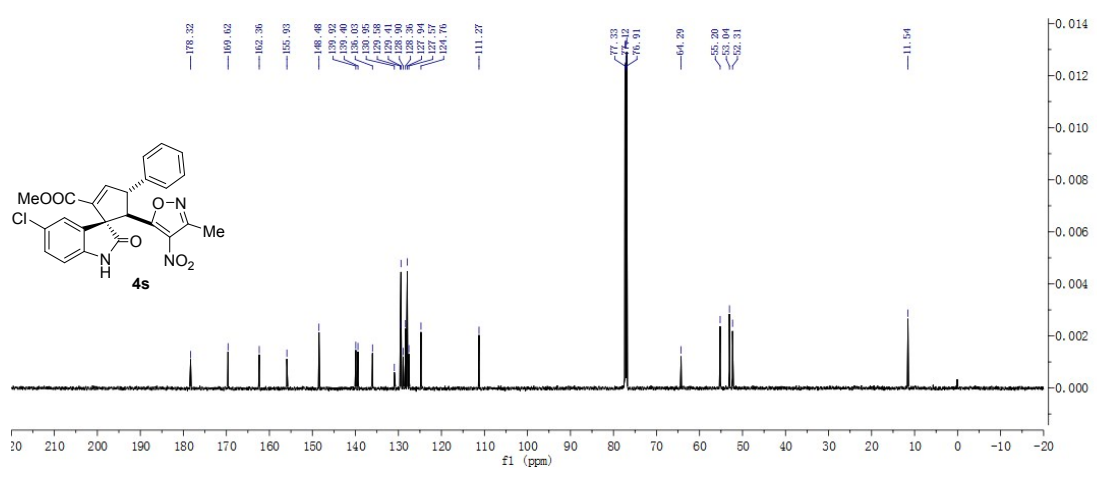

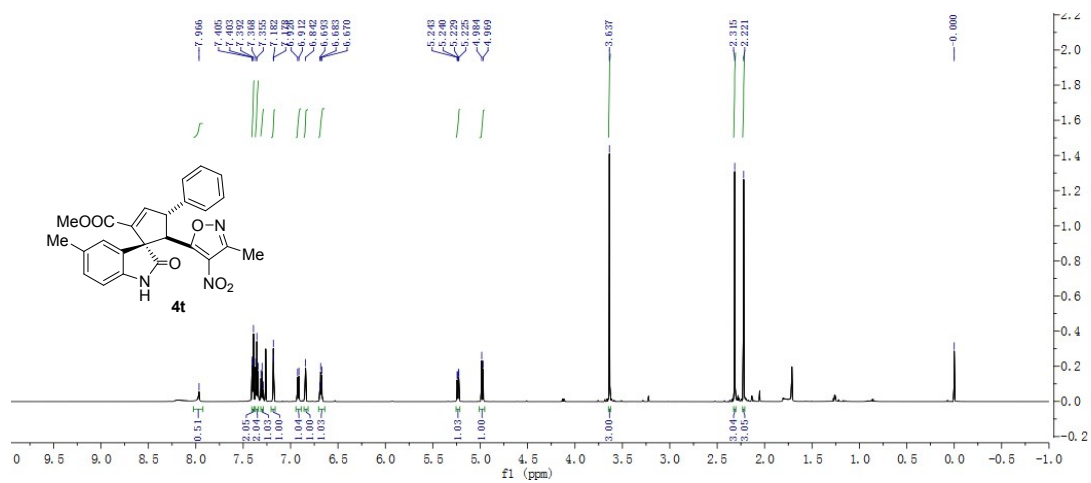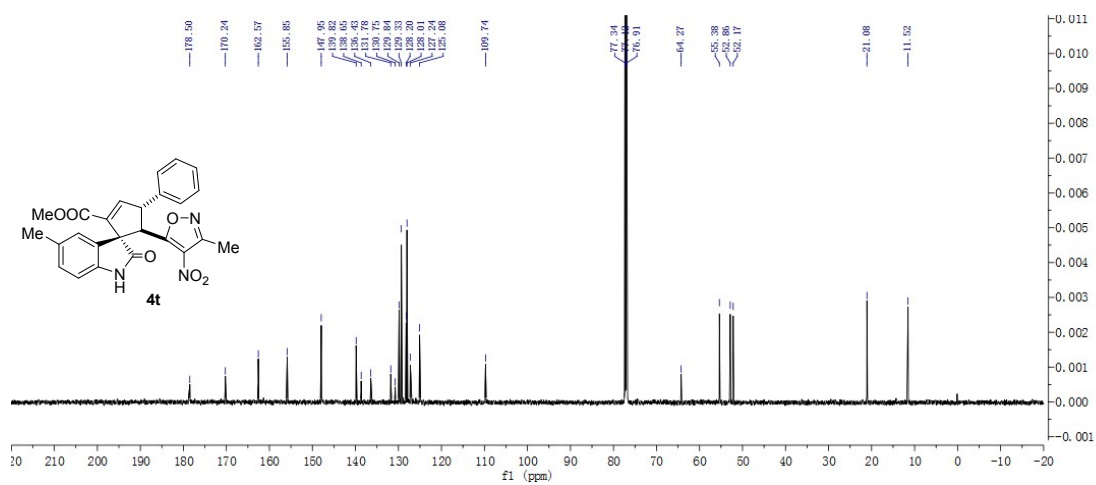

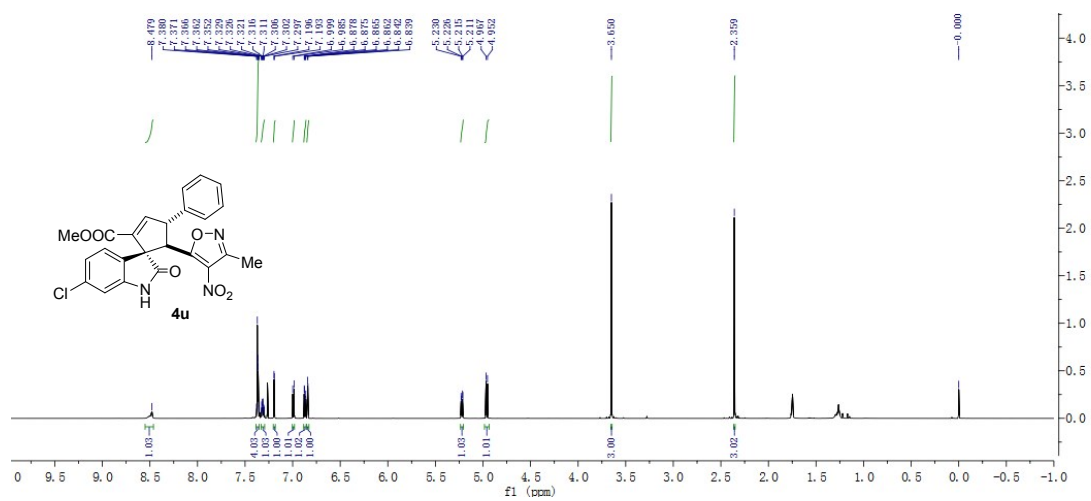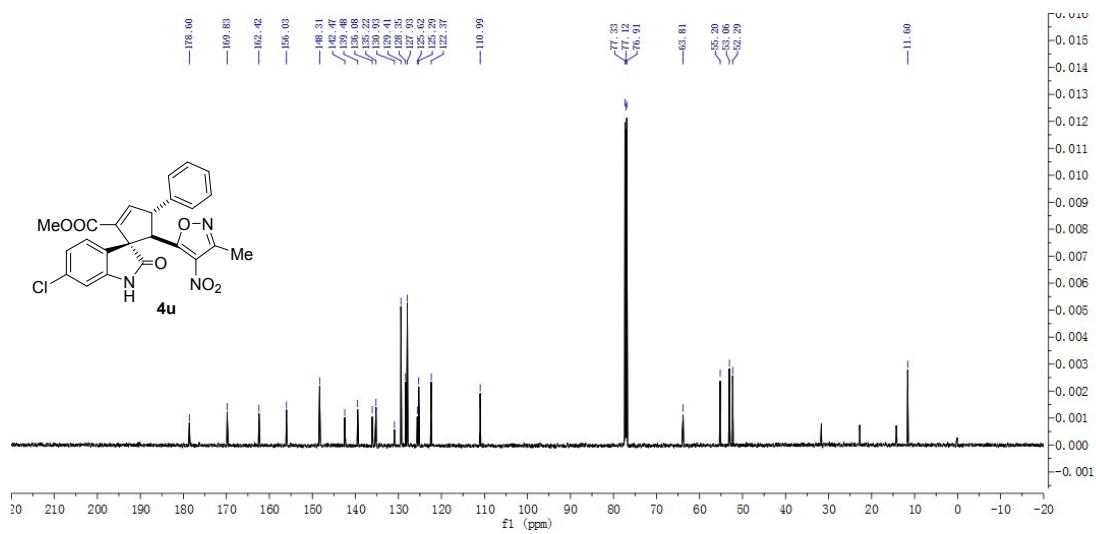

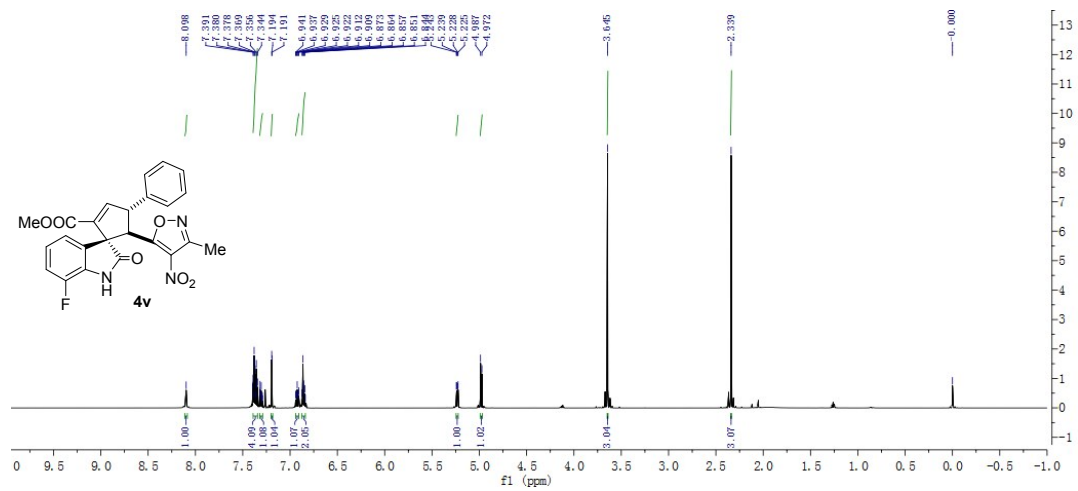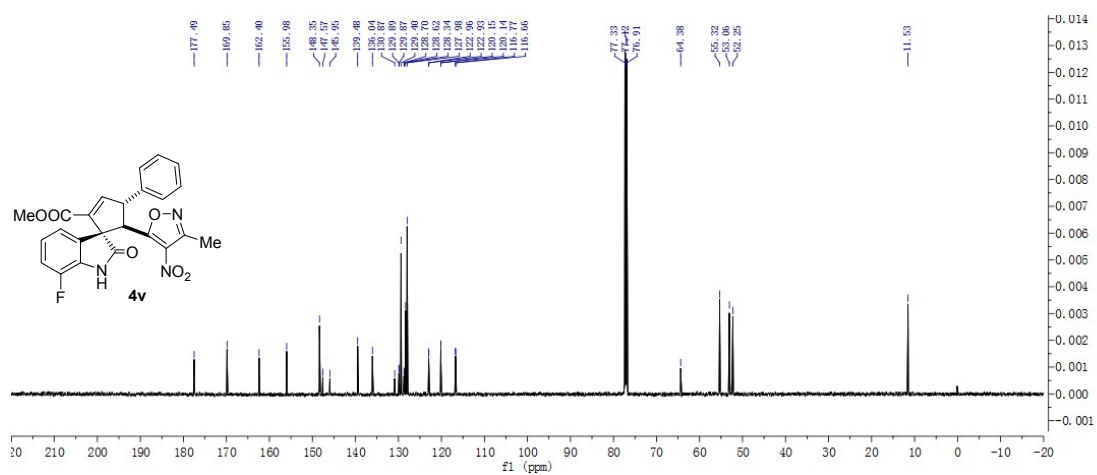

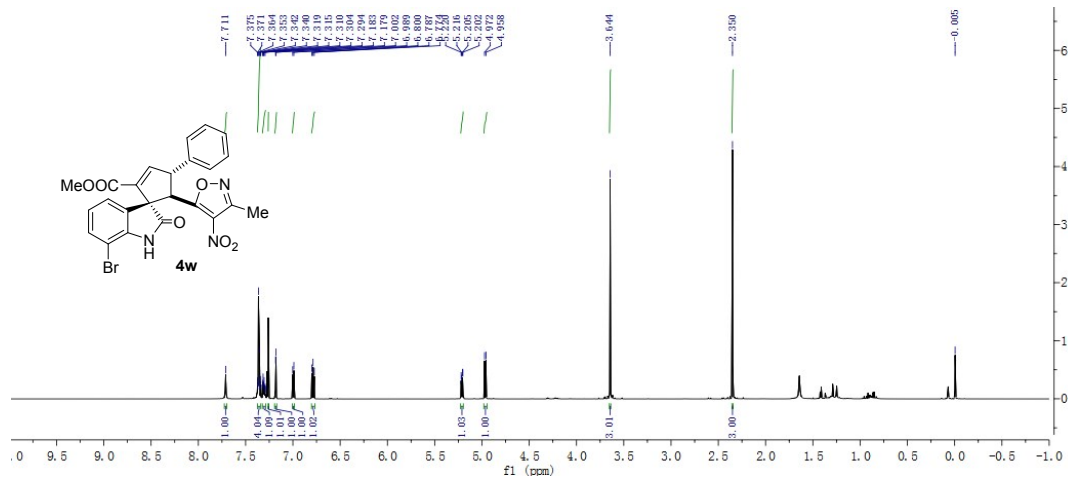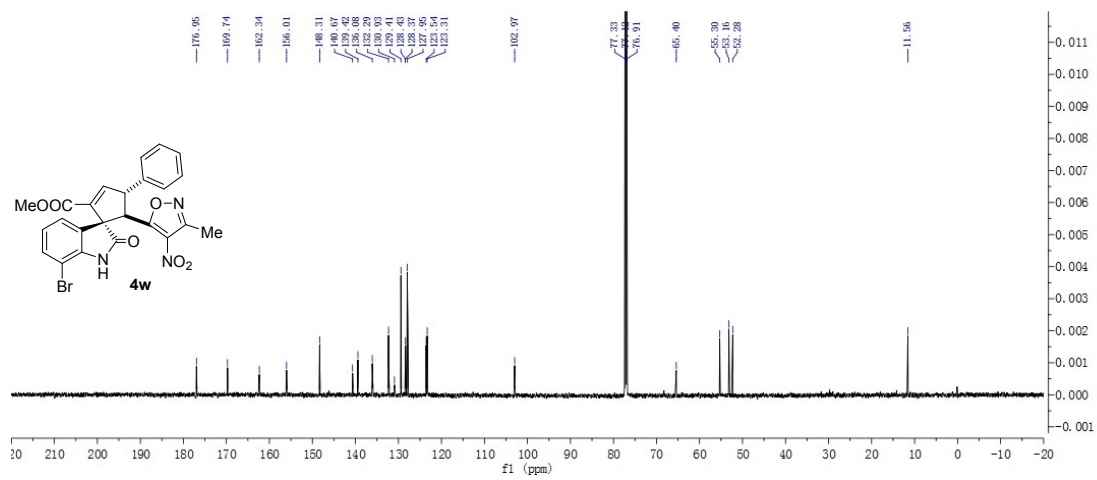

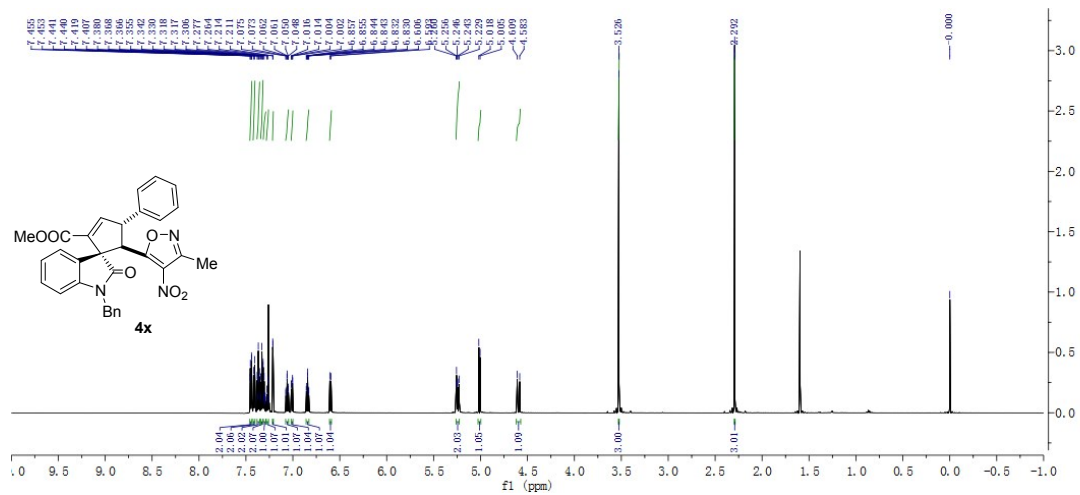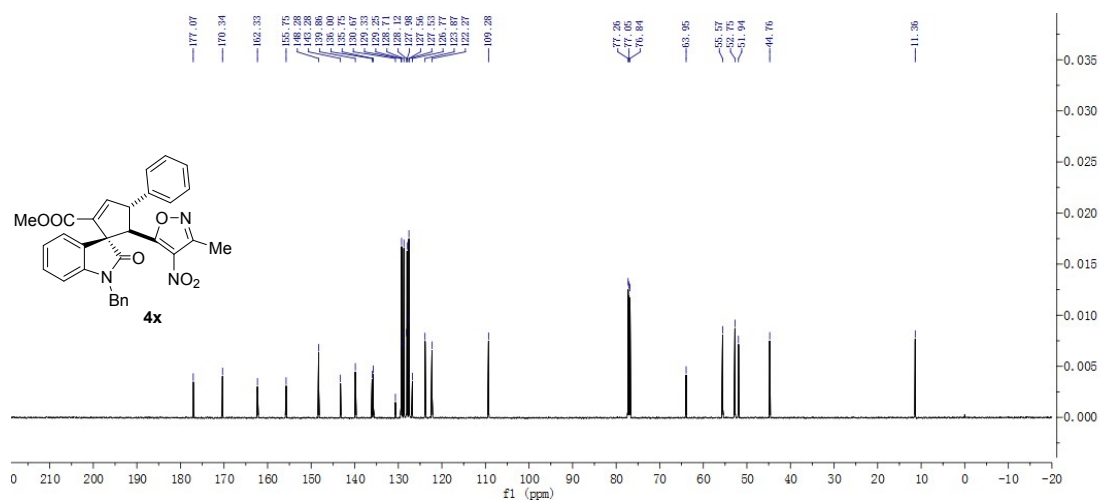

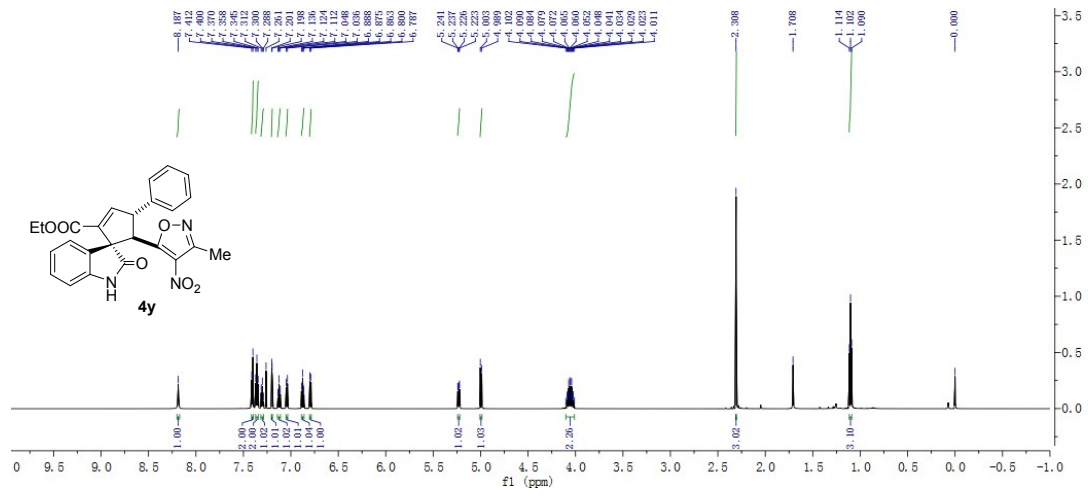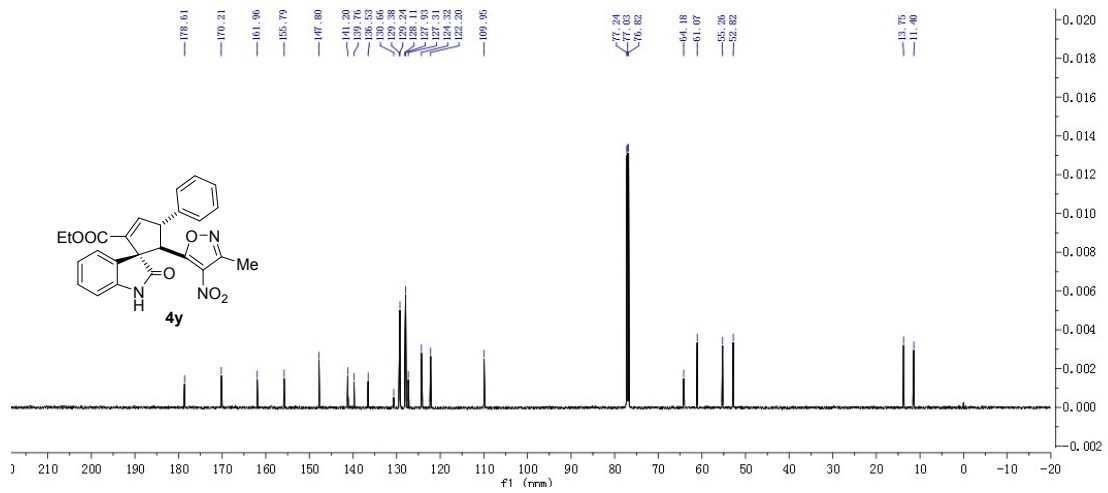

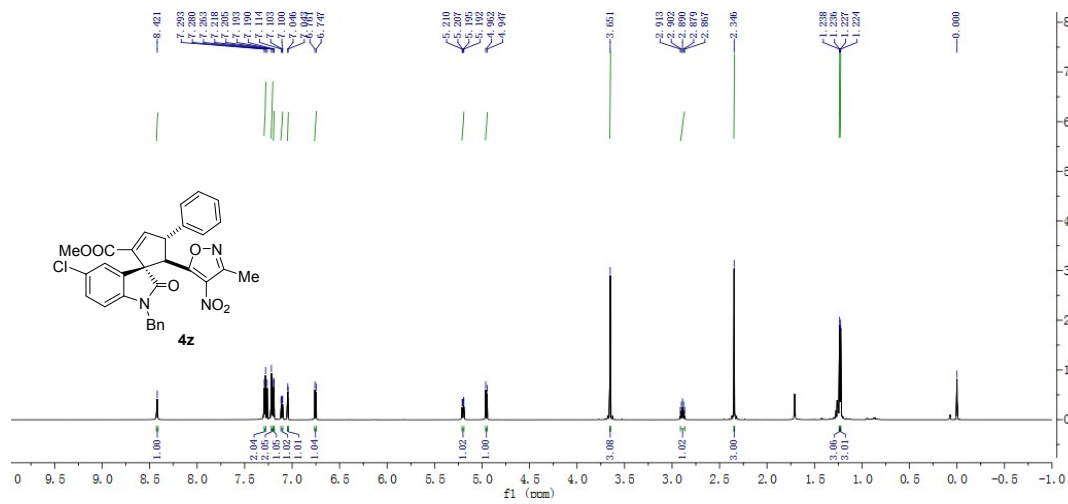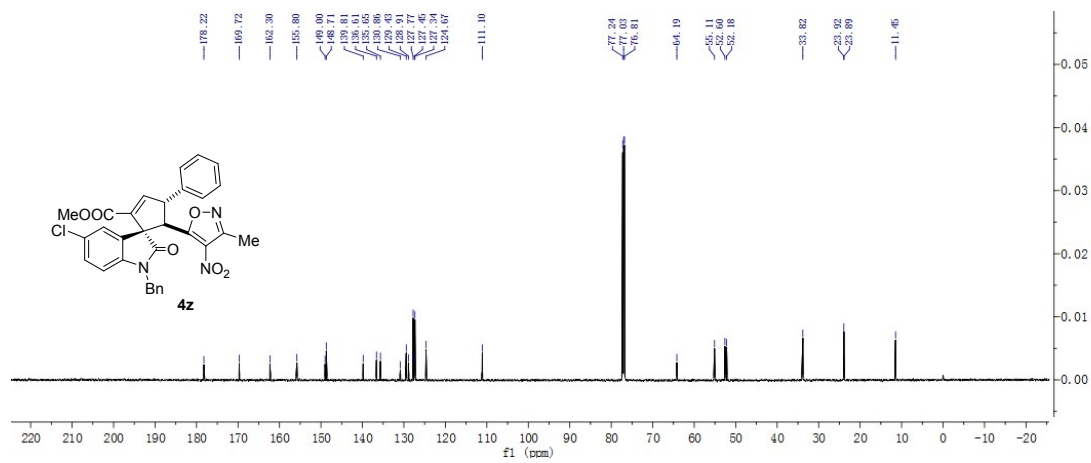



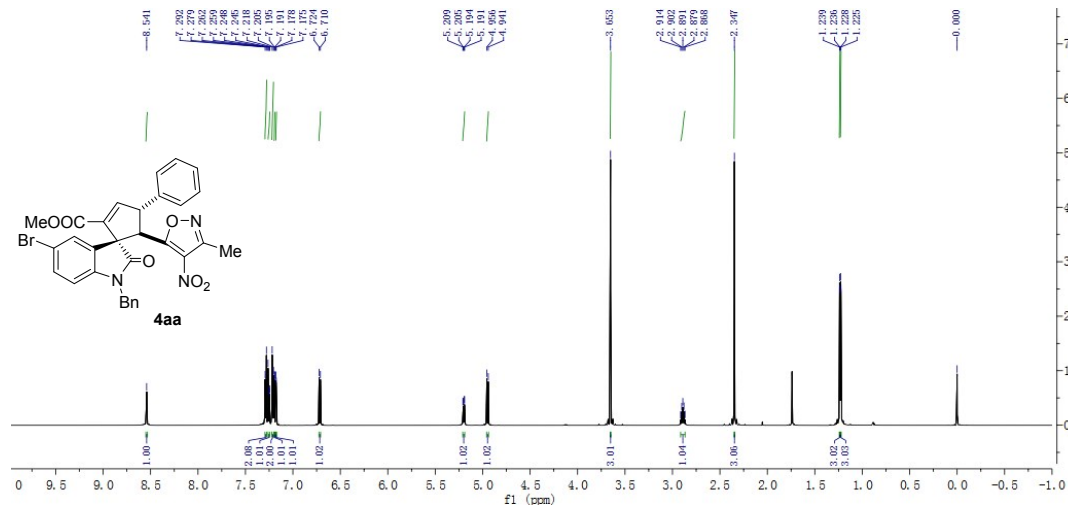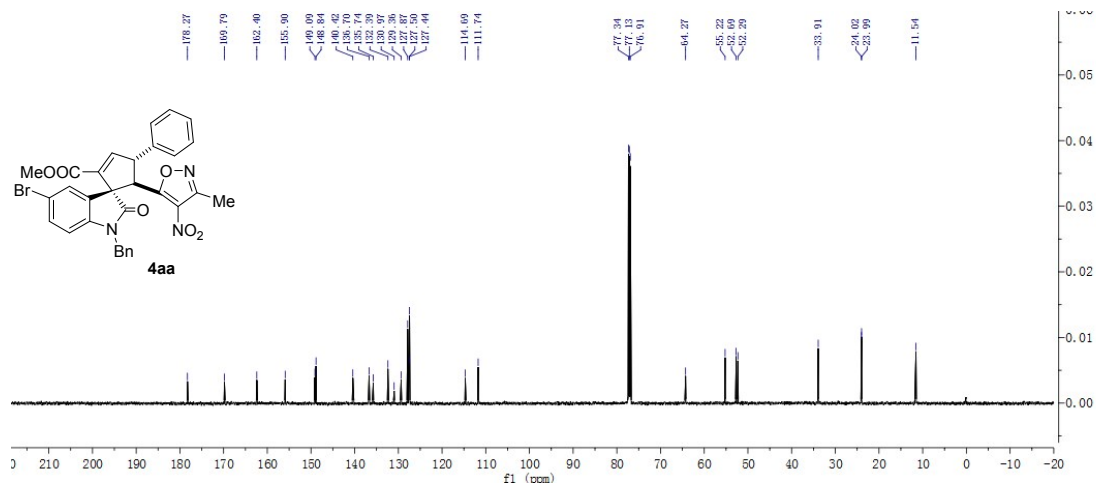

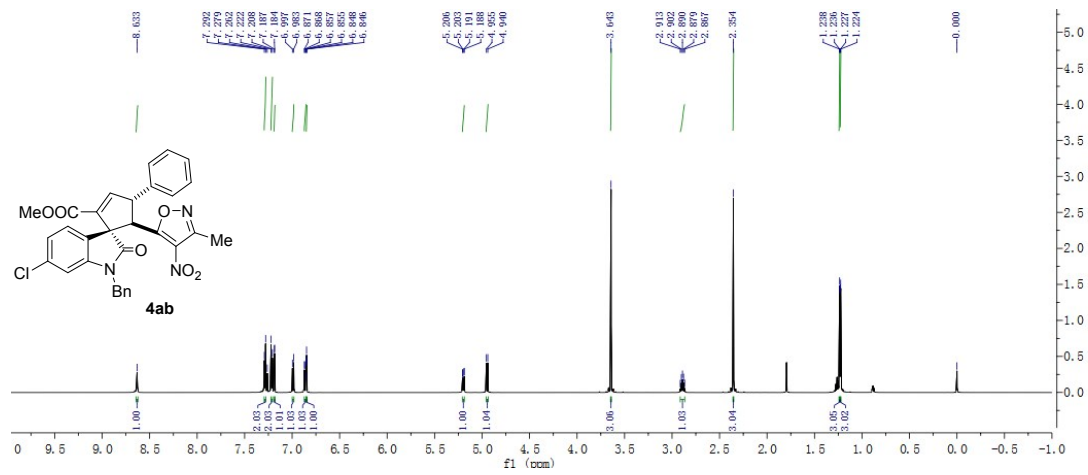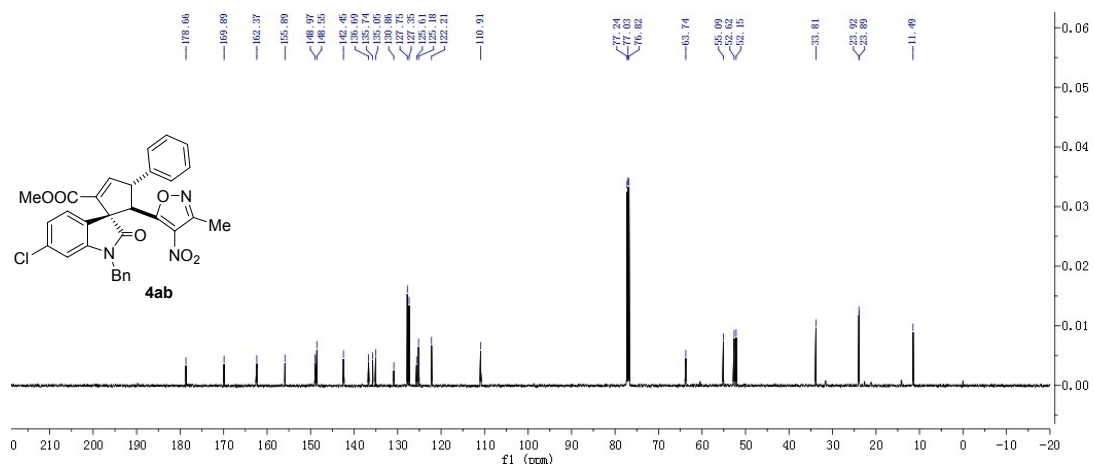

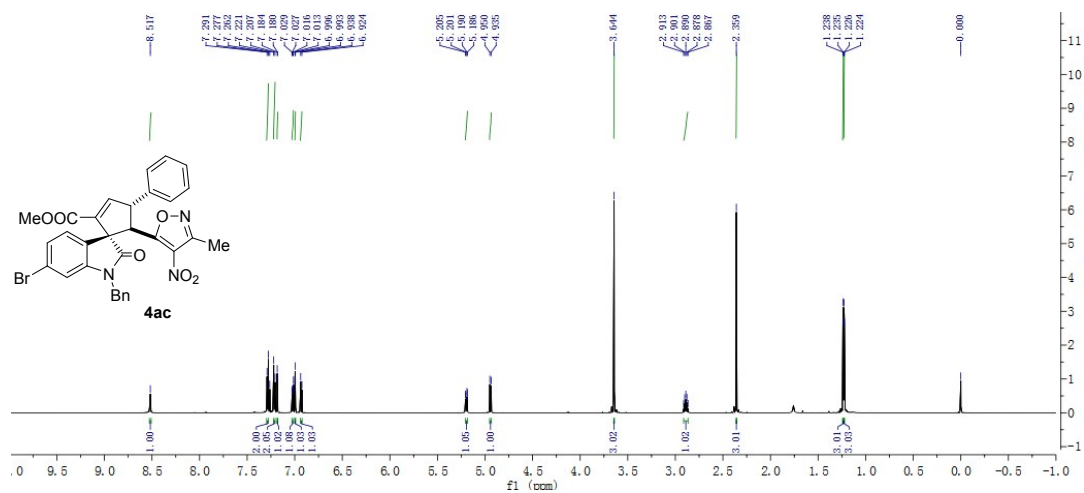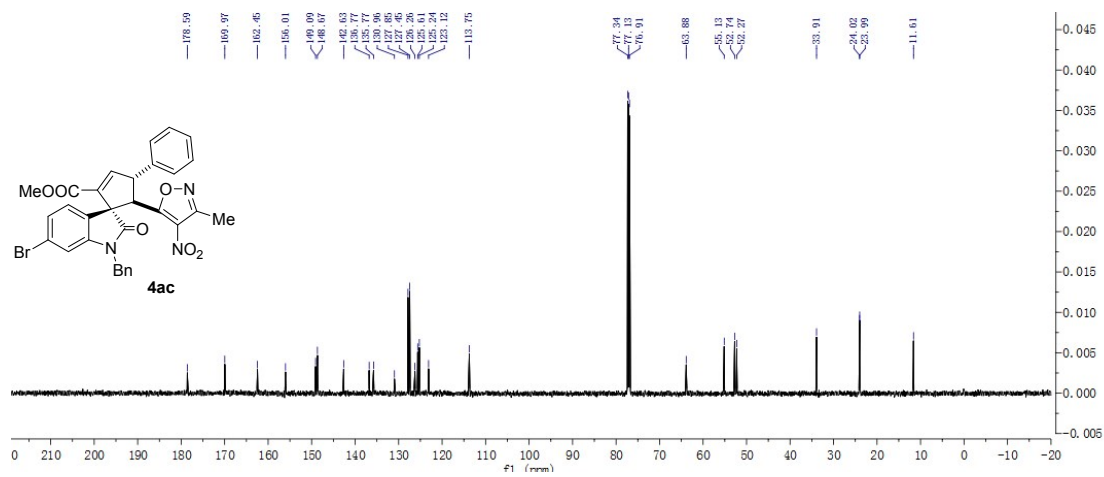

## 8. Experimental procedures of bioassays

### 8.1 FP-based (fluorescence polarization) MDM2 binding assay

The FP-based MDM2 assay were performed according to the previous reports and manufacturer's protocol. In brief, The fluorescent background were collected and calibrated by blank buffer, and the FP-values of tested compounds were determined by using a serial stock solution of compounds in DMSO. A test sample contained the test compounds, 10 nM of MDM2 binding proteins (preincubated) and 10 nM substrate peptide in buffer solution were added into microplates until the final volume. For each experiment, the fluorescent intensities of tested samples were read on the microplate reader after all the sample components were vortex mixed for 30min. The inhibitory constant ( $K_i$ ) was fitted by using the GraphPad Prism software.

### 8.2 Antiproliferation and selective cytotoxicity assays

The p53-wild HCT116 and LOVO colonrectal cancer cells, as well as the p53-mutated SW620, SW480, DLD-1, HT-29 and SW1116 colonrectal cancer cells were selected to perform cytotoxicity assay. In brief, The LOVO cells were seeded in 96-well plates with a density of  $5 \times 10^3$  cells per well and cultured with DMEM buffer under 5% CO<sub>2</sub> atmosphere at 37 °C. For the antiproliferation assays, the tested compounds were added with a serial of concentrations. After 48-hours incubation, added 10  $\mu$ L CCK8 (cell counting kit-8) solution into each well and then incubated 30-60 minutes. The OD values at 405nm were collected by a microplate reader. And the IC<sub>50</sub> values of

each compound were calculated by the GraphPad Prism software with Logistic regression method.

### 8.3 Molecular docking

The initial coordinates of MDM2 were collected from the co-crystallized structure of MDM2-inhibitor (PDB No. 4LWU) retrieved from the PDB (Protein Data Bank, <http://www.pdb.org>) database. Then we utilized the CDOCKER module of Accelrys Discovery Studio 3.5 Package and the CDOCKER score function to compounds **3d** into the substrate pocket of MDM2 using the protocol as described in our previous reports.

### 8.4 Western Blotting and immunofluorescent assays

LOVO cells were seeded into six-well plates with the intensities of  $3-5 \times 10^5$  cells per well, after 48h-incubation of compound **4z** or blank solution, the cells were collected, washed twice by cold PBS buffer, and then added the protease and phosphatase inhibitors contained lysis buffer. The total protein lysates were obtained after 15000 rpm centrifugation for 10-15 min. The protein extracts in each group were electrophoresis, transferred into PVDF membranes, incubated by corresponding primary antibodies and imaged by ECL method using the protocol as described in our previous reports. The intracellular ROS levels were detected with fluorescent probe DCF-DA (2',7'-dichlorofluorescein diacetate). In brief, LOVO cells were seeded into six-well plates, after added compound **4z** and then incubated for another two hours, the DCF-DA probe were added and then observed by a microplate reader.

## 8.5 Flowcytometry based apoptosis assay

LOVO cells were seeded into six-well plates with the intensities of  $3-5 \times 10^5$  cells per well, after 48h-incubation of compound **4z** or blank solution, the cells were harvested after trypsin digestion and then washed by ice-cold PBS twice. After cold-centrifuged and resuspended, cells were stained by annexin V-FITC/PI dual staining kit at 25 °C for 30 min in dark. The stained cells were detected by a flow cytometer and analyzed by the FlowJo 7.6 software.

## 9. Predicted ADMET properties of 4z

The predicted ADMET properties of compound 4z, including aqueous solubility, blood-brain barrier penetration, CYP2D6 binding, hepatotoxicity, intestinal absorption, and plasma-protein binding, were calculated and predicted. The results of ADME analysis are presented in **Figure S2** of the revised manuscript. The biplot figure showed two analogous 95% and 99% confidence ellipses for the blood-brain barrier penetration and human intestinal absorption models, respectively. The detailed results of pharmacokinetic properties for derivative 4z are shown in **Table S2**.

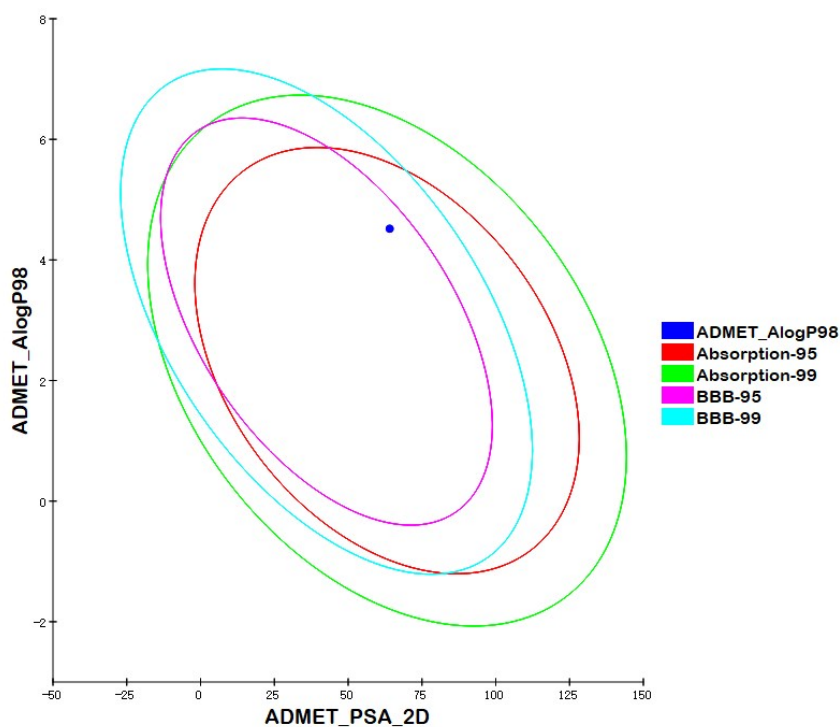

**Figure S2** Plot of PSA versus AlogP for compound **4z** showing the 95% and 99% confidence limit ellipses corresponding to the blood-brain barrier and intestinal absorption models. Abbreviations: ADMET, absorption, distribution, metabolism, excretion and toxicity; AlogP, the logarithm of the partition coefficient between n-octanol and water; BBB, blood-brain barrier; PSA, polar surface area; 2D, two-dimensional.

**Table S3 ADMET prediction and pharmacokinetic properties of compound 4z**

---

| Compound name | Aqueous solubility level | BBB penetration level | CYP2D6 binding prediction | Hepatotoxicity prediction | Intestinal absorption level | Plasma protein binding   | PSA   | AlogP98 |
|---------------|--------------------------|-----------------------|---------------------------|---------------------------|-----------------------------|--------------------------|-------|---------|
| <b>4z</b>     | 1 (Low)                  | 3 (low)               | False<br>(non-inhibitor)  | False<br>(nontoxic)       | 0 (good)                    | True<br>(highly bounded) | 68.91 | 4.49    |

---

Abbreviations: AlogP, the logarithm of the partition coefficient between n-octanol and water; PSA, polar surface area; ADMET, absorption, distribution, metabolism, excretion and toxicity.

---



## 10. References

- (1) Y. M. Chung, Y. J. Im and J. N. Kim, *Bull. Korean. Chem. Soc.*, **2002**, *23*, 1651-1654.
- (2) J. Zhang, X. Liu, X. Ma and R. Wang, *Chem. Commun.*, **2013**, *49*, 9329-9331.
